# 1                    **A key interfacial residue identified with in-cell structure**

## 2                    **characterization of a class A GPCR dimer**

3  
4                    Ju Yang<sup>2,7,8</sup>, Zhou Gong<sup>2,8</sup>, Yun-Bi Lu<sup>1,8</sup>, Chan-Juan Xu<sup>3</sup>, Tao-Feng Wei<sup>1</sup>, Men-Shi Yang<sup>2</sup>, Tian-Wei  
5                    Zhan<sup>4</sup>, Yu-Hong Yang<sup>2</sup>, Li Lin<sup>3</sup>, Jian-Feng Liu<sup>3\*</sup>, Chun Tang<sup>2,5\*</sup>, Wei-Ping Zhang<sup>1,6\*</sup>

6  
7                    <sup>1</sup>Department of Pharmacology, Key Laboratory of Medical Neurobiology of Ministry of Health of China,  
8                    Zhejiang University School of Medicine, Hangzhou, Zhejiang 310058, China.

9                    <sup>2</sup>Key Laboratory of Magnetic Resonance in Biological Systems of the Chinese Academy of Sciences,  
10                    State Key Laboratory of Magnetic Resonance and Atomic Molecular Physics, National Center for  
11                    Magnetic Resonance at Wuhan, Wuhan Institute of Physics and Mathematics of the Chinese Academy of  
12                    Sciences, Wuhan, Hubei 430071, China. College of Life Science and Technology, Collaborative  
13                    Innovation Center for Genetics and Development, Key Laboratory of Molecular Biophysics of Ministry  
14                    of Education, Huazhong University of Science and Technology, Wuhan, Hubei 430074, China.

15                    <sup>4</sup>Department of Thoracic Surgery, the Second Affiliated Hospital of Zhejiang University School of  
16                    Medicine, Zhejiang 310009, China.

17                    <sup>5</sup>Wuhan National Laboratory for Optoelectronics, Huazhong University of Science and Technology,  
18                    Wuhan, Hubei Province 430074, China.

19                    <sup>6</sup>Zhejiang Province Key Laboratory of Mental Disorder's Management, Zhejiang University School of  
20                    Medicine, Hangzhou, Zhejiang 310058, China.

21                    <sup>7</sup>University of the Chinese Academy of Sciences, Beijing 100049, China

22                    <sup>8</sup>These authors contributed equally.

23                    email: weiping601@zju.edu.cn; tanglab@wipm.ac.cn; jfliu@mail.hust.edu.cn

## 25 **Abstract**

26 G protein coupled receptors (GPCRs) have been shown homo-dimeric. Despite extensive studies,  
27 no single residue has been found essential for dimerization. Lacking an efficient method to shift  
28 the monomer-dimer equilibrium also makes functional relevance of GPCR dimer elusive. Here,  
29 using fluorescence lifetime-based imaging for distance measurements, we characterize the  
30 dimeric structure of GPR17, a class A GPCR, in cells. The structure reveals transmembrane  
31 helices 5 and 6 the dimer interface, and pinpoints F229 a key residue, mutations of which can  
32 render GPR17 monomeric or dimeric. Using the resulting mutants, we show that GPR17 dimer is  
33 coupled to both  $G\alpha_i$  and  $G\alpha_q$  signaling and is internalized, whereas GPR17 monomer is coupled  
34 to  $G\alpha_i$  signaling only and is not internalized. We further show that residues equivalent to F229 of  
35 GPR17 in several other class A GPCRs are also important for dimerization. Our findings thus  
36 provide fresh insights into GPCR structure and function.

37

38 **Keywords:** G protein coupled receptors (GPCRs); GPR17; receptor dimerization; structural  
39 modeling; fluorescence lifetime imaging microscopy fluorescence resonance energy transfer  
40 (FLIM-FRET)

41

42 The 800+ G-protein coupled receptors (GPCRs) constitute an important family of membrane  
43 receptor. GPCRs are responsible for myriad aspects of cellular functions and make up more than  
44 30% of current drug targets (*Hauser et al., 2018*). A GPCR is characterized with seven  
45 transmembrane helices (TM1 to TM7), with its intracellular loops interacting with G proteins  
46 and other signaling proteins to transduce signals. Experimental evidences have shown that  
47 GPCRs can form dimers and high-order oligomers (*Lohse, 2010*). Indeed, it is widely accepted  
48 that class C GPCRs, exemplified by GABA<sub>B</sub> and metabotropic glutamate receptors, form  
49 constitutive dimers. The class C GPCR is characterized with a large extracellular and dimeric N-  
50 terminal domain (NTD) for ligand binding (*Muto et al., 2007*). The presence of such a large  
51 NTD makes it easy to introduce fluorophores for resonance energy transfer (RET) measurements  
52 at the cell surface (*Maurel et al., 2008*). The oligomeric arrangement of reconstituted  
53 metabotropic glutamate receptor has also been visualized *in vitro* using cryo-electron microscopy  
54 (cryoEM) (*Koehl et al., 2019*).

55 Different from the class C GPCRs, a class A GPCR contains a much shorter and often  
56 unstructured N-terminal segment. It has been known for many years, that  $\beta_2$ -adrenergic receptor  
57 and M1 muscarinic acetylcholine receptor, two class A GPCRs, can dimerize and oligomerize  
58 (*Hebert et al., 1996; Hern et al., 2010*). Though increasing evidences have indicated that many  
59 class A GPCRs exist in dimers and oligomers, the molecular basis and functional relevance of  
60 GPCR dimer/oligomer remains to be fully established (*Lambert and Javitch, 2014; Milligan et*  
61 *al., 2019*). This is because the structures of the GPCR dimers and oligomers are mostly  
62 characterized *in vitro* for reconstituted proteins, and also because the transfection and over-  
63 expression of an exogenous GPCR in cells may inadvertently promote receptor dimerization and  
64 oligomerization. Moreover, a GPCR may dynamically interconvert between monomer, dimer

65 and oligomer, yet an efficient method to shift this equilibrium is lacking (*Kasai and Kusumi,*  
66 *2014; Gibert et al., 2017*). As such, a structural model of GPCR dimer in the cell membrane  
67 would shed light on the structural basis of dimerization and the distinct functions of monomer  
68 and dimer.

69 More than 300 atomic-resolution structures are now available for over 60 unique GPCRs.  
70 Despite the technological advance of cryoEM (*Garcia-Nafria et al., 2018*), X-ray  
71 crystallography remains the workhorse for structure determination of class A GPCRs. Moreover,  
72 some GPCRs have been crystalized as a dimer, either in a single asymmetric unit or related by  
73 crystallographic symmetry. Stenkamp analyzed 215 GPCR crystal structures from the protein  
74 data base (PDB), and found 13 GPCR dimers with 31 unique dimer interfaces are related by a  
75 two-fold rotational  $C_2$  symmetry (*Stenkamp, 2018*), with the interfaces involving TM1/TM2,  
76 TM3-TM5, TM3-TM6 or TM5/TM6. However, it is unclear whether these 31 dimer structures  
77 represent the physiological quaternary arrangements of the GPCRs. This is because the GPCRs  
78 were reconstituted in the detergent, liquid cubic phase or nanodisc for crystallization (*Xiang et*  
79 *al., 2016; Denisov and Sligar, 2017*), and because the majority of the dimer orientations in  
80 crystal other than the  $C_2$  symmetry are antiparallel, crisscross and ones incompatible with the cell  
81 membrane environment.

82 Though providing little structural details, a variety of other experimental methods have been  
83 employed to assess GPCR dimerization and oligomerization at the cellular level (*Guo et al.,*  
84 *2017; Milligan et al., 2019*). The methods include biochemical approaches like cross-linking, co-  
85 immunoprecipitation and protein-fragment complementation (*Romei and Boxer, 2019*). With the  
86 fluorophores site-specifically introduced, RET techniques including fluorescence resonance  
87 energy transfer (FRET), fluorescence lifetime imaging microscopy FRET (FLIM-FRET), time-

88 resolved FRET (TR-FRET), and bioluminescence resonance energy transfer (BRET) have been  
89 frequently used (*Faklaris et al., 2015*). In addition, fluorescence correlation spectroscopy (FCS),  
90 spatial intensity distribution analysis (SpIDA) and other single-molecule imaging techniques  
91 have revealed membrane co-localization of the receptors (*Calebiro and Sungkaworn, 2018*;  
92 *Gurevich and Gurevich, 2018*). Based on a single FRET distance measurement, it was also  
93 possible to model the structure of GPCR dimer in the cell membrane (*Greife et al., 2016*).

94 With the knowledge about the GPCR dimer, studies were carried out to disrupt GPCR  
95 dimerization and to modulate GPCR functions. For example, peptides derived from one of the  
96 transmembrane helices have been used to disrupt the dimerization of rhodopsin (*Jastrzebska et*  
97 *al., 2015*), and to inhibit dimerization and activation of  $\beta_2$  adrenergic receptor (*Hebert et al.,*  
98 *1996*). GPCR dimerization can also be disrupted with point mutations. For example, Capra et al.  
99 introduced single-residue mutations to TM1 of thromboxane receptor and found a small  
100 reduction in GPCR dimerization (*Capra et al., 2017*). Based on the protomer structure of M<sub>3</sub>  
101 muscarinic receptor, McMillin et al. systematically mutated all lipid-facing residues in M<sub>3</sub>  
102 muscarinic receptor to alanine, and found only a modest inhibition on GPCR dimerization  
103 (*McMillin et al., 2011*). Thus, though GPCR dimerization may involve a small interface  
104 (*Baltoumas et al., 2016*), no single residue has been identified essential for dimerization.

105 GPR17 is a class A GPCR involved in ischemic injuries of kidney, heart, and brain, and also  
106 involved in demyelination process associated with multiple sclerosis (MS) and other  
107 neurological diseases (*Marucci et al., 2016*; *Bonfanti et al., 2017*; *Lu et al., 2018*). GPR17 is  
108 phylogenetically related to purinergic P2Y and cysteinyl leukotriene (CysLT) receptors  
109 (*Marucci et al., 2016*). Both uracil nucleotides (e.g. UDP-glucose) and cysteinyl leukotrienes  
110 (e.g. LTD<sub>4</sub>) can activate GPR17, leading to the inhibition of adenylyl cyclase and the activation

111 of phospholipase C (PLC) (*Ciana et al., 2006; Buccioni et al., 2011*). Moreover, prolonged  
112 treatment of UDP-glucose and LTD<sub>4</sub> can lead to the down-regulation of GPR17 signal, which  
113 has been linked to ERK1/2 activation (*Daniele et al., 2014*) and GPR17 receptor internalization  
114 (*Daniele et al., 2011*).

115 To assess whether and how GPR17 homo-dimerizes, we performed FLIM-FRET analysis  
116 between GPR17 protomers expressed at the cell membrane. Using a confocal microscopy setup  
117 equipped with picosecond pulsed laser, the FLIM-FRET measures the fluorescence lifetime of  
118 donor fluorophore, which has an  $\langle r^{-6} \rangle$  relationship with the distance between donor and acceptor  
119 fluorophores (*Becker, 2012; Sun et al., 2013*). Importantly, the fluorescence lifetime is  
120 independent of the concentrations of donor and acceptor, and is largely insensitive to the leakage  
121 from donor emission and direct excitation of the acceptor. As such, the FLIM-FRET provides a  
122 more accurate distance measurement between fluorophores than the standard intensity-based  
123 FRET measurement. In addition to N-terminal labeling, we also introduced fluorophores at the  
124 extracellular loops (ECLs) of GPR17 using a split-GFP strategy (*Jiang et al., 2016*), and  
125 measured multiple FRET distances. Using the distance restraints, we have obtained a well-  
126 converged structural model of GPR17 homo-dimer in the cell membrane and identified  
127 TM5/TM6 as the dimer interface. Importantly, single point mutations to an essential residue in  
128 TM5 can shift the GPR17 monomer-dimer equilibrium, and consequently modulate the  
129 downstream signals.

## 130 **Results**

131 **GPR17 dimerizes and oligomerizes in the cell membrane.** We extracted proteins from mouse  
132 tissues, and performed Western blotting analysis for endogenous GPR17 using anti-GPR17  
133 antibody. Under denaturing conditions, a band with the size of GPR17 monomer could be

134 detected (*Figure 1a*). When the samples were prepared without SDS and without boiling,  
135 however, GPR17 appears mostly as dimer and high-order oligomers, with only a faint band  
136 corresponding to the monomer (*Figure 1b*). Thus, GPR17 from the tissues readily forms dimers  
137 and oligomers that can be preserved under non-denaturing conditions.

138 We also expressed human GPR17 proteins in HEK293 cells upon transient transfection.  
139 When co-transfected, both His-tagged and HA-tagged GPR17 expressed well, and the monomer,  
140 dimer and oligomers of GPR17 could be identified using anti-His or anti-HA antibodies under  
141 non-denaturing conditions (*Figure 1c*). Importantly, His-tag and HA-tag can both be identified in  
142 GPR17 dimers. Purified from Ni-NTA agarose beads, the His-tagged GPR17 proteins can be  
143 blotted with anti-His antibody as monomer and dimers, but can only be blotted with anti-HA  
144 antibody as dimers and oligomers (*Figure 1d*). Taken together, the co-immunoprecipitation data  
145 indicate that GPR17 homo-dimerizes in the cell membrane.

146 **GPR17 protomers can FRET in the homo-dimer.** To analyze how GPR17 dimerizes, we  
147 performed FLIM-FRET measurement between the two protomers of GPR17 at the cell  
148 membrane. We engineered GFP and mCherry tags at specific sites of GPR17, as fluorescent  
149 donor and acceptor, respectively. The mCherry was appended at the N-terminus of GPR17, and  
150 the GFP was either appended at the N-terminus or inserted to one of ECLs using the split-GFP  
151 stratagem previously described (*Jiang et al., 2016*). In this labeling approach, the two C-terminal  
152  $\beta$ -strands of GFP (GFP<sub>10-11</sub>) were engineered at ECL1 after residue G128, at ECL2 after residue  
153 R214, or at ECL3 after residue R291. Glycine residues are padded at each end of the inserted  $\beta$ -  
154 strands, so that the split-GFP can rapidly reorient with respect to GPR17 (*Figure 2—figure*  
155 *supplement 1a, b*). Subsequently, a recombinantly prepared, proteolytically derived GFP  
156 fragment comprising the first nine  $\beta$ -strands (GFP<sub>1-9</sub>) was added to the cells, which complements

157 the two  $\beta$ -strands already inserted and regenerates GFP fluorescence. This scheme allowed us to  
158 introduce GFP fluorophore to GPR17 only at extracellular surface of the cell membrane. More  
159 importantly, a total of four pairs of FRET distances could be obtained using this labeling  
160 approach (*Figure 2a*).

161 All GFP-tagged GPR17 constructs expressed well and fluoresce. We measured fluorescence  
162 lifetime of the GFP alone ( $\tau_D$ ) at the cell membrane (*Figure 2b*), and found that the averaged  
163 lifetime for GFP varies from 2.18 ns to 1.82 ns (*Figure 2c*). The variation is likely a result of the  
164 local environment at the insertion site around the fluorophore, which has been noted before  
165 (*Suhling et al., 2002; Ito et al., 2009; Berezin and Achilefu, 2010*). The co-transfection of  
166 mCherry-tagged GPR17 shortened the fluorescence lifetime of the GFP labeled at another  
167 GPR17 protomer. This means that two GPR17 protomers interact with each other, allowing the  
168 FRET to occur. Depending on the labeling site, the fluorescence lifetime of GFP with mCherry  
169 as FRET acceptor ( $\tau_{DA}$ ) varies (*Figure 2c; Table 1*). The largest FRET was observed for GFP  
170 introduced at ECL3, whereas essentially no FRET was observed for GFP labeled at the ECL1 of  
171 GPR17 (*Figure 2d*). The averaged FRET efficiencies could be converted to distances (*Figure 2e*;  
172 *Table 1*). For the ECL1 site, the lack of FRET could be attributed to a large separation between  
173 the two fluorophores, and an arbitrary distance ( $> 10.2$  nm, for two times of the Förster distance  
174 for GFP-mCherry pair) was given. Since the FRET is related to the inter-fluorophore distance by  
175 inverse sixth power and quickly disappears at longer distance, the FLIM-FRET measurements  
176 should mostly manifest the arrangement of GPR17 dimer but not the oligomer.

177 **Table 1.** FRET distances from the measurement of GFP fluorescence lifetime

| FRET pairs | $\tau_D$ (ns) | $\tau_{DA}$ (ns) | p value* | FRET efficiency | FRET distance $r^\dagger$ | Calculated Inter-fluorophore |
|------------|---------------|------------------|----------|-----------------|---------------------------|------------------------------|
|------------|---------------|------------------|----------|-----------------|---------------------------|------------------------------|



|        |             |             |          | $E^{\ddagger}$ |         | distance <sup>‡</sup> |
|--------|-------------|-------------|----------|----------------|---------|-----------------------|
| ECL1:N | 1.837±0.071 | 1.854±0.049 | 0.28     | 0              | > 102 Å | 104.2 Å               |
| ECL2:N | 1.914±0.083 | 1.771±0.083 | 1.75E-13 | 0.075          | 77.5 Å  | 77.4 Å                |
| ECL3:N | 2.076±0.126 | 1.744±0.157 | 8.44E-15 | 0.16           | 67 Å    | 56.1 Å                |
| N:N    | 2.17±0.077  | 2.025±0.049 | 1.83E-10 | 0.067          | 79 Å    | 89.0 Å                |

178 \* Compared between  $\tau_D$  and  $\tau_{DA}$ , unpaired  $t$ -test.

179 <sup>¶</sup> Only the average FRET efficiency is given without the S.D. due to large variation for different  
180 pixels.

181 <sup>†</sup> Converted from FRET efficiency using the GFP-mCherry Förster distance of 51 Å (*Albertazzi*  
182 *et al., 2009; Akrap et al., 2010*).

183 <sup>‡</sup> The averaged distance between the centers-of-mass of the tagged florescent proteins are  
184 calculated for the GPR17 homo-dimer structures.

185 **Modeling the native GPR17 dimer structure pinpoints key interfacial residues.** The four  
186 pairs of GFP-mCherry tags have different FRET efficiencies and FRET distances (*Table 1*). This  
187 can only be explained by that the two GPR17 protomers in the dimer adopt a preferred  
188 orientation in the cell membrane. Since there is no experimentally determined structure of  
189 GPR17, we first built the model of GPR17 monomer with threaded homology modeling  
190 approach (*Roy et al., 2010*) (*Figure 3—figure supplement 1a*). The predicted structures of  
191 GPR17 monomer were highly converged (*Figure 3—figure supplement 1b*). Moreover, the  
192 monomer structure remained stable after extended MD simulations in the lipid bilayer  
193 environment (*Figure 3—figure supplement 1c-e*), indicative of a correctly folded structure.

194 Starting from the monomer structure, we modeled the dimer structure of GPR17 that can  
195 simultaneously account for all inter-protomer FRET measurements (*Figure 3—figure*  
196 *supplement 2*). The sterically allowed conformers of mCherry and GFP tags were first calculated  
197 (*Figure 2—figure supplement 1*), and the centers-of-mass of all these conformers with respect to  
198 GPR17 protomer were used for the application of FRET distance restraints. We refined the  
199 dimeric structure of GPR17 using distance-restrained rigid-body simulated annealing with  
200 concurrent enforcement of the  $C_2$  dimer symmetry. The calculated structures of GPR17 dimer  
201 were well-converged, with the largest root-mean-square (RMS) deviation of backbone heavy  
202 atoms  $< 3 \text{ \AA}$  (*Figure 3a*). The dimer interface involves TM5 and TM6, with a total buried surface  
203 area  $1615 \pm 269 \text{ \AA}^2$ . In particular, a pair of phenylalanines, residues F229 and F233 in TM5,  
204 were found at the dimer interface (*Figure 3a*), and the hydrophobic interactions and possibly  
205 aromatic stacking between these residues are likely important for dimerization. The dimer  
206 structure of GPR17 was subjected to MD simulations, which remained largely stable in the lipid  
207 bilayer (*Figure 3b, c; Figure 3—figure supplement 3*).

208 To assess the importance of F229 and F233 for GPR17 dimerization, we introduced  
209 mutations to these two interfacial residues. With F229 and F233 mutated to alanines *in silico*, the  
210 resulting protomer structure remains stable, and the backbone RMS deviation is comparable to  
211 that of the wildtype GPR17 (*Figure 3—figure supplement 4a*). In contrast, the dimeric structure  
212 of GPR17 becomes unstable, and the overall RMS deviation is larger (*Figure 3b; Figure 3—*  
213 *figure supplement 4b*). This can be attributed to the dissociation of the two GPR17 protomers, as  
214 manifested by the increasing distance between the protomers (*Figure 3c*). Steered MD

215 simulations further indicates that F229A/F233A mutant is about 4 kCal/mol less stable than the  
216 wildtype protein (*Figure 3d*).

217 Single point mutations can also change the stability of GPR17 dimer. Steered MD  
218 simulations of single alanine mutants of GPR17 indicate that residue F229 contributes more free  
219 energy to GPR17 dimerization than F233 does (*Figure 3d*). As a positive control, we performed  
220 MD simulations for F229C and F233C mutants of GPR17, one at a time. With an inter-protomer  
221 disulfide bond formed, the cysteine mutation allowed the GPR17 to form a stable covalent dimer.  
222 Indeed, the RMS deviations of the covalent GPR17 dimers are comparable to that of wildtype  
223 GPR17 dimer (*Figure 3e; Figure 3—figure supplement 5*). Taken together, intra-membrane  
224 residues F229 and to a lesser degree F233 in TM5 can be the key residues for GPR17  
225 dimerization.

226 **F229 is essential for GPR17 dimerization.** To assess the importance of residues F229 and F233  
227 for the dimerization of GPR17 at the cellular level, we introduced F229A and F233A double  
228 mutation and repeated the FLIM-FRET measurement. The data showed that upon the mutation,  
229 no FRET was observed between fluorophores introduced at ECL3:N sites (*Figure 2a*), and the  
230 fluorescence lifetime of GFP remains the same as that of GFP alone (*Figure 4a*). This means that  
231 the mutation abrogates GPR17 homo-dimerization, which is consistent with the MD simulations.  
232 Western blotting analysis showed that the monomer population significantly increases upon the  
233 F229A/F233A mutation (*Figure 4b*, lane 2). However, there remains a large portion of GPR17  
234 dimeric and oligomeric species, which may be heteromers involving interfaces other than TM5.

235 To further assess the individual roles of F229 and F233 in GPR17 dimerization, we  
236 introduced single point mutations to the protein. Similar to the double mutation, F229A mutation  
237 also increased the monomer population of GPR17 (*Figure 4b*, lane 3). The disruption of F233A

238 mutation is smaller, as the F233A mutant of GPR17 remains mainly as dimer and oligomers  
239 (*Figure 4b*, lane 4). As expected, F229C and F233C mutations largely eliminate the monomeric  
240 species of GPR17, yielding mostly dimer and oligomers (*Figure 4b*, lanes 5 and 6). Interestingly,  
241 administration of UDP-glucose, an agonist of GPR17, does not perturb the relative  
242 monomer/dimer population of wildtype GPR17 (*Figure 4c*). Similarly, the monomer/dimer ratio  
243 for the F229A/F233A mutant is unperturbed upon the addition of UDP-glucose (*Figure 4c*).

244 To differentiate GPR17 homomers from heteromers, we co-transfected His-tagged and HA-  
245 tagged wildtype and mutant GPR17 plasmids. Both anti-His and anti-HA antibodies could blot  
246 the monomeric, dimeric and oligomeric species of GPR17 extracted from the cell lysate (*Figure*  
247 *4d*). On the other hand, anti-HA antibody failed to blot the affinity-purified F229A and  
248 F229A/F233A GPR17 mutants (*Figure 4e*, right panel), even though anti-His antibody could blot  
249 His-tagged GPR17 proteins purified from Ni-NTA agarose beads (*Figure 4e*, left panel). In  
250 comparison, F233A, F229C, and F233C mutants of GPR17 could be blotted with anti-HA  
251 antibody as dimers and oligomers, which are similar to the wildtype GPR17. Thus, in agreement  
252 with the MD simulations, the experimental data showed that residue F229 in TM5 is essential for  
253 the homo-dimerization of GPR17.

254 **Forced monomer and forced dimer of GPR17 have different functions.** GPR17 is coupled to  
255 both  $G\alpha_i$  and  $G\alpha_q$  intracellular signaling pathways (*Ciana et al., 2006; Buccioni et al., 2011*). As  
256 mutations to key interfacial residues can make GPR17 monomeric or dimeric, we thus assessed  
257 the difference in secondary signals including intracellular cAMP and  $Ca^{2+}$  levels. Administration  
258 of UDP-glucose to GPR17-expressing cells led to the activation of  $G\alpha_i$ , which inhibited adenylyl  
259 cyclase (AC) activity and inhibited forskalin-induced increase of intracellular cAMP level.  
260 Similar to the wildtype GPR17, addition of UDP-glucose also caused significant decrease of the

261 cAMP level for either monomeric or dimeric mutant of GPR17 (*Figure 5a, b*). As such,  $G\alpha_i$   
262 signaling is largely unimpaired for the forced monomers and dimers of GPR17.

263 The coupling of  $G\alpha_q$  can lead to the activation of phospholipase C (PLC) and subsequent  
264 increase of intracellular  $Ca^{2+}$  level (*Lu et al., 2018*). We transfected HEK293 cells with a  
265 bicistronic vector for simultaneous expression of GPR17 and GFP from a single mRNA  
266 transcript. The GFP fluorescence intensities are comparable for the wildtype and mutant GPR17,  
267 suggesting similar transfection and expression levels (*Figure 5—figure supplement 1*).  
268 Comparing to the non-transfected cells, administration of UDP-glucose to cells transfected with  
269 wildtype GPR17 caused an increase of intracellular  $Ca^{2+}$  level in a concentration-dependent  
270 manner. In contrast, cells transfected with F229A/F233A mutant of GPR17 exhibited almost  
271 identical response as the non-transfected cells (*Figure 5c, f*). Similarly, F229A mutation nearly  
272 abolished the response of intracellular  $Ca^{2+}$  level upon the administration of UDP-glucose. On  
273 the other hand, F233A mutation only partially quenched such response (*Figure 5d, f*). For the  
274 dimeric control, however, cells transfected with F229C or F233C mutant of GPR17 exhibited  
275 almost the same response of intracellular  $Ca^{2+}$  level to UDP-glucose treatment as the cells  
276 transfected with wildtype GPR17 (*Figure 5e, f*).

277 Phosphorylation of ERK1/2 was shown downstream of  $G\alpha_q$  activation (*Shen et al., 2018*).  
278 We found that, administration of UDP-glucose caused phosphorylation of ERK1/2 proteins in  
279 GPR17-transfected cells, but not in non-transfected cells (*Figure 5g, h*). For cells transfected  
280 with F229A/F233A and F229A mutant of GPR17, the activation of ERK1/2 is significantly  
281 lower than the cells transfected with wildtype GPR17. In comparison, the cells transfected with  
282 F233A, F229C and F233C mutant of GPR17 exhibited similar levels of ERK1/2 phosphorylation  
283 as the cells transfected with wildtype GPR17 (*Figure 5g, h*). Taken together,  $G\alpha_q$  signaling

284 involves only the dimeric species of GPR17, which is impaired upon the introduction of  
285 monomeric mutations.

286 **GPR17 is internalized as dimer.** It has been shown that GPCRs are internalized as dimer (*Ward*  
287 *et al., 2013; Faklaris et al., 2015*). Therefore, we further assessed the relationship between  
288 GPR17 dimerization and receptor internalization. Western blotting analysis showed that, upon  
289 the treatment of UDP-glucose, the membrane-associated GPR17 protein level significantly  
290 decreased, while at the same time the cytoplasm localized GPR17 significantly increased (*Figure*  
291 *6a-c*). This means that UDP-glucose can induce GPR17 internalization, even though UDP-  
292 glucose does not change the dimer status of GPR17 (*Figure 4c*). In contrast, for the F229A/F33A  
293 mutant of GPR17, UDP-glucose does not lead to an increase of cytoplasm-localized GPR17  
294 (*Figure 6a-c*).

295 To visualize the internalization process, we introduced a split-GFP fluorophore at ECL3 of  
296 GPR17 (*Figure 2a*). Thus, only the GPR17 protein localized at the cell membrane can be  
297 initially visualized. Note that introduction of the fluorophore using this approach does not affect  
298 the trafficking of GPR17 to the cell membrane (*Figure 6d; Figure 6—figure supplement 1*). 24  
299 hours after the treatment of UDP-glucose, most GFP-tagged GPR17 becomes internalized for  
300 cells transfected with wildtype, F233A, F229C and F233C mutants of GPR17. In contrast, the  
301 F229A/F233A and F229A mutants of GPR17 remain mostly at the membrane (*Figure 6d; Figure*  
302 *6—figure supplement 1*), which is consistent the Western blot analysis (*Figure 6a-c*). As such,  
303 UDP-glucose induced the internalization of GPR17 dimer but not the monomer.

304 **Residues equivalent to F229 in other GPCRs are also important for dimerization.** The  $\mu$ -  
305 opioid receptor has been crystalized as a dimer in each asymmetric unit (*Manglik et al., 2012*),  
306 and the dimer also utilizes TM5 and TM6 as the interface (*Baltoumas et al., 2016; Stenkamp,*

307 **2018**), involving residue F239 (*Figure 7—figure supplement 1a*). Indeed, the dimer structure of  
308  $\mu$ -opioid receptor is stable during MD simulations, while an alanine mutation to F239 in helix  
309 TM5 drastically decreases the stability of  $\mu$ -opioid receptor dimer (*Figure 7—figure supplement*  
310 *1b, c*). Western blotting analysis confirmed that the receptor can form a homo-dimer in cells  
311 (*Figure 7a, b*). Moreover, we found that the F239A mutation for the  $\mu$ -opioid receptor increased  
312 the population of the monomeric species, while decreased the population of homo-dimeric and  
313 homo-oligomeric species carrying both His- and HA-tags (*Figure 7a, b*).

314 GPR17 is phylogenetically related to cysteinyl leukotriene receptors including CysLT<sub>1</sub> and  
315 CysLT<sub>2</sub>. Residues F198 in CysLT<sub>1</sub> and C210 in CysLT<sub>2</sub> are equivalent to residue F229 in GPR17  
316 (*Isberg et al., 2015; Pandy-Szekeres et al., 2018*). We thus assessed their roles for the  
317 dimerization of CysLT<sub>1</sub> and CysLT<sub>2</sub> receptors. Co-transfection of His-tagged and HA-tagged  
318 CysLT<sub>1</sub> and CysLT<sub>2</sub> receptors showed that both receptors can form dimers and oligomers  
319 (*Figure 7c, e*). Purified using Ni-NTA agarose beads, the His-tagged proteins can be blotted with  
320 anti-His antibody as monomer, dimers, and oligomers, but can only be blotted with anti-HA  
321 antibody as dimers and oligomers (*Figure 7d, f*). This means that both CysLT<sub>1</sub> and CysLT<sub>2</sub>  
322 receptors can form homo-dimers. Importantly, the F198A mutation increased the monomer  
323 population of CysLT<sub>1</sub> (*Figure 7c, d*). Similarly, the C210A mutation but not the C210W  
324 mutation increased the population of CysLT<sub>2</sub> monomer (*Figure 7e, f*). Note that C210W is a  
325 naturally occurring mutation for human CysLT<sub>2</sub> with no debilitating phenotype (*Pandy-Szekeres*  
326 *et al., 2018*), and therefore, it is likely that inter-protomer aromatic stacking between the  
327 tryptophan residues promotes CysLT<sub>2</sub> dimerization in lieu of a covalent disulfide linkage.  
328 Interestingly, the F198A mutation in CysLT<sub>1</sub> and the C210A mutation in CysLT<sub>2</sub> were found to  
329 increase the monomer population at the expense of both dimers and oligomers, whereas the

330 population of homo-dimers and homo-oligomers carrying both His- and HA-tags were found  
331 about the same for mutant and wildtype proteins. Thus, residues F198 of CysLT<sub>1</sub> and C210 of  
332 CysLT<sub>2</sub> are important for receptor homo-dimerization, but they can also be involved in receptor  
333 hetero-dimerization.

## 334 **Discussion**

335 On the basis of FLIM-FRET analysis, we have modeled the dimeric structure of GPR17, a  
336 class A GPCR, in its native cell membrane environment. In doing so, we were able to pinpoint  
337 F229 as the key interfacial residue for GPR17 dimerization. Mutating this key residue can force  
338 GPR17 monomeric or dimeric, which then allowed us to dissect the respective functions of  
339 GPR17 monomer and dimer (*Figure 8*). In addition, residue equivalent to F229 in certain other  
340 GPCRs can also be important for receptor dimerization.

341 Using a split GFP labeling strategy (*Jiang et al., 2016*), we achieved multi-site labeling and  
342 obtained several cross-validating distance restraints. The multiple inter-protomer distances, in  
343 conjunction with rigid-body simulated annealing refinement, allowed us to obtain a precise  
344 description of the GPR17 dimer structure in cells. In comparison, in a previous study with  
345 FRET-based modeling of GPCR dimer structure in the cell membrane (*Greife et al., 2016*), only  
346 a single distance was obtained between the fluorescent proteins fused at protein N-termini. As a  
347 result, several dimeric models involving different interfaces could all account for this FRET  
348 distance measurement. Here, the structure of GPR17 dimer is well converged, showing  
349 unambiguously that GPR17 dimer interface involves TM5 and TM6.

350 The well-converged GPR17 dimer structure allowed us to identify a key interfacial residue,  
351 F229 in TM5. The importance of this key residue was assessed with a range of experiments and



352 MD simulations. Alanine mutation of F229 makes GPR17 monomeric, whereas cysteine  
353 mutation yields an intermolecular disulfide bond and makes GPR17 dimeric. To the best of our  
354 knowledge, this is the first time it has been shown, that a single point mutation can effectively  
355 shift the equilibrium and force a class A GPCR monomeric or dimeric. Interestingly, the  
356 equivalent of F229 is highly conserved among P2Y and CysLT GPCRs. The only two exceptions  
357 are human P2Y<sub>11</sub> and CysLT<sub>2</sub> receptors, both of which have cysteine residues instead. We have  
358 also experimentally confirmed the importance of F198 in CysLT<sub>1</sub> and C210 in CysLT<sub>2</sub>, the two  
359 equivalent residues. We also found that TM5 residue F239 in  $\mu$ -opioid receptor, a more distantly  
360 related class A GPCR, is also important for receptor dimerization.

361 It has been noted that GPCR dimerization is dynamic. First, the association between GPCR  
362 protomers is dynamic, and the GPCR can alternate between monomer, dimer and oligomer. This  
363 has been shown for class A receptors including M<sub>1</sub> muscarinic receptor (*Hern et al., 2010*), and  
364  $\beta_1$ ,  $\beta_2$  and GABA<sub>B</sub> receptors in the cell membrane (*Calebiro et al., 2013*). Secondly, the  
365 arrangement of the GPCR dimer is dynamic. It has been shown that the dimer of metatropic  
366 glutamate receptor 2, a class C GPCR receptor, utilizes a different interface upon the addition of  
367 the agonist (*Xue et al., 2015*). In the present study, the dimer of GPR17 is rather stable, and the  
368 addition of the agonist did not change the monomer/dimer ratio. Moreover, F229 is located  
369 outside the heptahelical bundle of GPR17, and mutations to F229 have little impact on the  
370 structure of GPR17 protomer. Accordingly, the application of UDP-glucose led to the same  
371 degrees of inhibition of the intracellular cAMP levels for cells transfected with wildtype GPR17  
372 and with GPR17 mutants. Importantly, the results indicate that GPR17-coupled G $\alpha_i$  signaling  
373 and adenylyl cyclase activity are independent of monomer-dimer equilibrium of the receptor.

374 On the other hand, mutations to residue F229 in TM5 has a large effect on  $G\alpha_q$  signaling.  
375 Upon the activation of GPR17-coupled  $G\alpha_q$ , PLC and PKC activities are up-regulated, which  
376 then lead to changes in intracellular  $Ca^{2+}$ -level and ERK1/2 phosphorylation level (*Marucci et*  
377 *al., 2016; Bonfanti et al., 2017; Lu et al., 2018*). Comparing with the cells transfected with  
378 wildtype GPR17, cells transfected with GPR17 monomeric mutant exhibits significantly lower  
379 intracellular  $Ca^{2+}$  and ERK1/2 phosphorylation levels upon UDP-glucose treatment. Thus,  
380 GPR17 dimer exhibits a biased signaling from GPR17 monomer. It has been previously reported  
381 that GPCR can be internalized as homo-dimer or hetero-dimers (*Ecke et al., 2008; Ward et al.,*  
382 *2013; Ge et al., 2017; Smith et al., 2017*). Consistent with these reports, we found that the  
383 monomeric mutations impeded the internalization of GPR17 that could be otherwise triggered  
384 upon agonist binding. It can be thus concluded that GPR17 is internalized as a dimer.

385 Besides residue F229 in TM5, the structural model of GPR17 dimer also indicates that TM5  
386 residue F233 from the two protomers are also outward facing and close to each other. Though  
387 F233C mutation could lock GPR17 in a covalent dimer, F233A mutation failed to disrupt the  
388 GPR17 dimer. On the contrary, the mutation appears to decrease the monomer population  
389 (*Figure 4d, e*), which can be attributed to different and possibly stronger GPR17-GPR17  
390 interactions upon the mutation. Nevertheless, cells transfected with F233A mutant of GPR17 has  
391 lower  $Ca^{2+}$ -level in response to UDP-glucose treatment than the cells transfected with wildtype  
392 protein (*Figure 5d, f*). This means that F233 plays a subtler role in receptor dimerization than  
393 F229, and probably helps to correctly position F229 side chains and the two GPR17 protomers  
394 for dimerization.

395 In summary, we have identified a key residue in GPR17 essential for receptor dimerization,  
396 and dissected the respective functions of GPR17 monomer and dimer. Our data also suggests that

397 GPR17 homo- and hetero-dimerization utilize different interfaces, which can be further  
398 investigated. Moreover, the equivalent residues in other class A GPCRs can also be mutated to  
399 evaluate to the respective functions of forced monomer and forced dimer. The dissection of  
400 GPCR functions by monomer and dimer can also help the development of “smart” drugs for  
401 precise pharmacological intervention of GPCR signaling.

402 **Acknowledgements**

403 Funding: The work has been supported by the National Key R&D Program of China  
404 (2018YFA0507700 to Z.G., C.T., Y.B.L., and W.P.Z., and 2016YFA0501200 to Z.G. and C.T.),  
405 and by the National Natural Science Foundation of China (81573400 to W.P.Z., 91753132 and  
406 31770799 to C.T., and 31400735 to Z.G.).

407 **Ethics**

408 Ethics Animal experimentation: The mouse was handled in accordance with the Guideline for  
409 the Care and Use of the Laboratory Animals of the National Institutes of Health. All procedures  
410 were approved by the Ethics Committee of Laboratory Animal Care and Welfare, Zhejiang  
411 University School of Medicine. The experiment was performed strictly according the approved  
412 protocols (ZJU2015-12-02).

413

## 414 Materials and methods

| Reagent type (species) or resource | Designation                                                    | Source or reference                                              | Identifiers     | Additional information |
|------------------------------------|----------------------------------------------------------------|------------------------------------------------------------------|-----------------|------------------------|
| Cell line (human)                  | HEK 293                                                        | Cell Biology of the Chinese Academy of Sciences, Shanghai, China | cat#GNHu43      |                        |
| plasmid                            | pIRES2-EGFP                                                    | Clontech Laboratories, Mountain View, USA                        | cat#6029-1      |                        |
| plasmid                            | pcDNA3.1(+)                                                    | Invitrogen by Thermo Fisher Scientific, California, USA          | cat#V79020      |                        |
| GPR17 ligands                      | UDP-glucose                                                    | Sigma-Aldrich Co., St. louis MO, USA                             | cat#U4625-400MG |                        |
|                                    | BCA Protein Assay Kit                                          | Beyotime Biotechnology, Shanghai, China                          | cat#P0009       |                        |
| Inhibitor                          | protease inhibitor cocktail                                    | Beyotime Biotechnology, Shanghai, China                          | cat#P1008       |                        |
| Inhibitor                          | Phosphatase inhibitor cocktail                                 | Beyotime Biotechnology, Shanghai, China                          | cat#P1081       |                        |
| protein extraction reagent         | RIPA Lysis Buffer                                              | Beyotime Biotechnology, Shanghai, China                          | cat#P0013B      |                        |
| protein extraction kit             | Total Protein Extraction Kit for Cells and Tissues             | Kangchen Bio-tech Inc., Shanghai, China                          | cat#KC-415      |                        |
| Protein Extraction Kit             | Membrane and Cytosol Protein Extraction Kit                    | Beyotime Biotechnology, Shanghai, China                          | cat#P0033       |                        |
| Antibody                           | anti-phosphor-ERK1/2 (mouse polyclonal)                        | Cell Signaling Technology, Boston, USA                           | cat#9106        | 1:1000                 |
| Antibody                           | anti-total ERK1/2 (rabbit polyclonal)                          | Cell Signaling Technology, Boston, USA                           | cat#9102        | 1:1000                 |
| Antibody                           | anti-His Tag (mouse polyclonal)                                | Ruiying Biological Technology, Suzhou, China                     | cat#RLM002      | 1:2000                 |
| Antibody                           | anti-HA Tag (rabbit polyclonal)                                | Proteintech Group, Wuhan, China                                  | cat#51064-2-AP  | 1:500                  |
| Antibody                           | anti-GAPDH (mouse polyclonal)                                  | Proteintech Group, Wuhan, China                                  | cat#60004-1-Ig  | 1:4000                 |
| Antibody                           | anti-GPR17 (mouse polyclonal)                                  | Santa Cruz Biotechnology, Texas, USA                             | cat#SC-514723   | 1:500                  |
| Antibody                           | anti-Na <sup>+</sup> /K <sup>+</sup> ATPase(rabbit polyclonal) | Proteintech Group, Wuhan, China                                  | cat#14418-1-AP  | 1:500                  |
| Antibody                           | anti-mouse IgG, HRP-Linked secondary (horse polyclonal)        | Cell Signaling Technology, Massachusetts, USA                    | cat#7076        | 1:3000                 |
| Antibody                           | anti-rabbit IgG, HRP-Linked secondary (goat polyclonal)        | Cell Signaling Technology, Massachusetts, USA                    | cat#7074        | 1:3000                 |
| Antifade mountant                  | anti-fade medium with DAPI                                     | Invitrogen, Carlsbad, CA, USA                                    | cat#P36931      |                        |

|                              |                                                       |                                                             |                |  |
|------------------------------|-------------------------------------------------------|-------------------------------------------------------------|----------------|--|
| reagent                      |                                                       |                                                             |                |  |
| cAMP assay reagent           | Coelenterazine h                                      | Promega, Madison, USA                                       | cat#S2011      |  |
| cAMP assay reagent           | Forskolin                                             | Sigma-Aldrich, St. Louis, MO, USA                           | cat#F6886-10MG |  |
| Calcium assay reagent        | Rhod 2 AM                                             | Life technologies, Eugene, USA                              | cat#R1245MP    |  |
| Calcium assay plate          | microplate reader                                     | Perkin-Elmer, Waltham, USA                                  | cat#6005290    |  |
| CAMP assay 96 MicroWell      | 96-well white plate                                   | Thermo Scientific Nunc, Denmark                             | cat#236105     |  |
| Calcium assay reagent        | Pluronic™ F-127 (20% Solution in DMSO)                | Sigma-Aldrich, St. Louis, MO, USA                           | cat#P3000MP    |  |
| Protein purification reagent | Ni-NTA agarose beads                                  | Qiagen, Hilden, Germany                                     | cat#1018244    |  |
| Cell culture medium          | DMEM                                                  | Gibco by Thermo Fisher Scientific                           | cat#11995500BT |  |
| Cell culture medium          | Opti-MEM                                              | Gibco by Life Technology, Carlsbad, USA                     | cat#31985-070  |  |
| Cell culture reagent         | fetal bovine serum                                    | Zhejiang Tianhang Biotechnology, Hangzhou, China            | cat#13011-8611 |  |
| Transfection reagent         | Polyethyleneimine, linear, M.W. 25,000                | Alfa Aesar Chemical, Shanghai, China, CAS number: 9002-98-6 | cat#43896      |  |
| Western reagent              | Western ECL substrate                                 | Biorad, Hercules, USA                                       | cat#170-5061   |  |
| Western reagent              | Immobilon-NC Membrane, 0.45 μm                        | Millipore Corporation, Billerica, USA                       | cat#HATF00010  |  |
| Western Imaging System       | ChemiDoc™ MP V3                                       | Biorad, Hercules, USA                                       | cat#17001395   |  |
| Microscope                   | A1 confocal laser-scanning microscope                 | Nikon, Tokyo, Japan                                         |                |  |
| Photon counting equipment    | Time correlated single photon counting (TCSPC) module | PicoQuant, Berlin, Germany                                  |                |  |
| Diode laser                  | diode laser                                           | LDH-P-C-485B, PicoQuant, Germany                            |                |  |
| cAMP assay system            | Mithras LB 940                                        | Berthold, Bad Wildbad, Germany                              |                |  |
| Software                     | Quantity One                                          | Biorad, Hercules, USA                                       |                |  |
| Software                     | SymphoTime 64                                         | PicoQuant, Germany                                          |                |  |
| Software                     | GraphPad Prism 6.0                                    | GraphPad Software                                           |                |  |
| Software                     | PyMOL Molecular Graphics System Version 2.2           | Schrödinger, LLC.                                           |                |  |

415

416

417

#### 418 **Construction of plasmids**

419 All plasmids used in this study are listed in Supplementary table 1, and the primers used for the  
420 construction of plasmids are listed in Supplementary table 2.

#### 421 **Cell lines and cell culture**

422 HEK293 cells were purchased from the Institute of Cell Biology of the Chinese Academy of  
423 Sciences (Cell Biology of the Chinese Academy of Sciences, Shanghai, China). Cells were  
424 grown in Dulbecco's modified essential medium (DMEM, Gibco by Thermo Fisher Scientific)  
425 supplemented with 10% heat-inactivated fetal bovine serum (Zhejiang Tianhang Biotechnology,  
426 China) at 37 °C, in the atmosphere of 5% CO<sub>2</sub>.

#### 427 **Cell transfection**

428 A cost-efficient transfection approach was used with polyethyleneimine (PEI, linear with average  
429 molecular weight 25,000 Da, Alfa Aesar Chemical, Shanghai, China) according to the literature  
430 (*Longo et al., 2013*). Briefly, PEI stock solution (1 µg/µL) was prepared by dissolving in  
431 endotoxin-free ddH<sub>2</sub>O. A suitable number of cells were seeded one day prior to transfection, and  
432 as a result the cells were ~70-80% confluent at the time of transfection. Before transfection,  
433 plasmid DNA and PEI (at the weight ratio of 1:2) was carefully mixed with appropriate volume  
434 of Opti-MEM (Gibco by Life Technology, Carlsbad, USA), and the mixture was incubated at  
435 room temperature for 25 min. The freshly formed DNA/PEI precipitates were carefully pipetted  
436 to the cells. The medium containing transfection reagents was removed and fresh medium was  
437 added 6 h after transfection.

#### 438 **Ni-NTA agarose affinity purification**

439 His-tagged and HA-tagged wildtype or mutant receptors (at DNA ratio of 1:1) were transfected  
440 to HEK293 cells. 36 hours after transfection, the cells were washed with PBS buffer, lysed for 60  
441 min at 4 °C in lysis buffer (containing 25 mM Tris-HCl pH 8.0, 150 mM NaCl, 1% n-Dodecyl-  
442  $\beta$ -D-maltopyranoside, protease inhibitor cocktail, Beyotime Biotechnology, Shanghai, China),  
443 and centrifuged at 14,000 g for 15 min at 4 °C. The supernatant was incubated with Ni-NTA  
444 agarose beads (Qiagen, Germany, catalog number 1018244) for 30 min at 4 °C. The Ni-NTA  
445 agarose beads were washed three times with the washing buffer (25 mM Tris-HCl pH 8.0, 150  
446 mM NaCl, 0.05% n-Dodecyl- $\beta$ -D-maltopyranoside, 20 mM imidazole). The His-tagged protein  
447 was eluted with the elution buffer (25 mM Tris-HCl pH 8.0, 150 mM NaCl, 0.05% n-Dodecyl- $\beta$ -  
448 D-maltopyranoside, 300 mM imidazole). The protein concentrations of total cell lysate and of  
449 Ni-NTA agarose affinity-purified protein were determined using a BCA Protein Assay Kit  
450 (Beyotime Biotechnology, Shanghai, China, catalog number P0009).

#### 451 **Western blotting analysis**

452 One C57BL/6J male mouse was purchased from Zhejiang Academy of Medical Sciences. The  
453 mouse brain, lung, heart and kidney tissues were separated after deeply euthanized by  
454 intraperitoneal injection of pentobarbital sodium (250 mg/kg). The total protein from the tissues  
455 was extracted by using protein extraction kit (Kangchen Bio-tech Inc., Shanghai, China, catalog  
456 number KC-415). The total cell lysate was prepared with RIPA buffer (Beyotime Biotechnology,  
457 Shanghai, China, catalog number P0013B). The membrane protein and cytoplasmic protein were  
458 isolated by Membrane and Cytosol Protein Extraction Kit (Beyotime Biotechnology, Shanghai,  
459 China, catalog number P0033). The protein concentration was determined with the use of BCA  
460 Protein Assay Kit (Beyotime Biotechnology, Shanghai, China).



461 Protein samples were separated on a 10% SDS-PAGE and transferred to nitrocellulose  
462 membranes (Millipore Corporation, Billerica, USA). The non-denaturing condition was achieved  
463 with the use of SDS-free sample buffer and without sample boiling before loading sample. The  
464 membranes were blocked with 5% non-fat dried milk at room temperature for 60 min, and were  
465 incubated with first antibodies overnight at 4 °C. To detect the expression of native and  
466 transfected GPR17 proteins, the first antibodies include mouse anti-GPR17 polyclonal antibody  
467 (Santa Cruz Biotechnology, Texas, USA, SC-514723, diluted at 1:500), mouse anti-His tag  
468 polyclonal antibody (Ruiying Biological Technology, Suzhou, China, RLM002, 1:2000), anti-  
469 HA antibody (Proteintech Group, Wuhan, China, 51064-2-AP, 1:500), mouse anti-GAPDH  
470 polyclonal antibody (Proteintech Group, 60004-1-Ig, 1:4000) and rabbit anti-Na<sup>+</sup>/K<sup>+</sup> ATPase  
471 antibody (Proteintech Group, Wuhan, China, 14418-1-AP, 1:500). The membranes were then  
472 washed and incubated with the corresponding secondary antibodies for 1.5 hours at room  
473 temperature, which include HRP-conjugated anti-mouse IgG (Cell Signaling Technology,  
474 Massachusetts, China, 7076, 1:3000) and HRP-conjugated anti-rabbit IgG (Cell Signaling  
475 Technology, 7074, 1:3000). After washing with TBS-T buffer (25mM Tris, 137 mM NaCl, 0.1%  
476 Tween-20 , pH 7.6), the membranes were incubated in ECL substrate (Biorad, Hercules, USA),  
477 and the chemiluminescence was detected on ChemiDoc™ MPV3 (Biorad, Hercules, USA).  
478 Densitometric evaluation of the blots was performed using the program Quantity One (Biorad,  
479 Hercules, USA).

480 To assess the internalization of GPR17, HEK 293 cells were transfected with His-tagged  
481 GPR17. Two days after transfection, 100 μM UDP-glucose (Sigma-Aldrich Co., St. louis MO,  
482 USA, U4625-400MG) was applied to the culture medium. 24 hours after treatment, the cells  
483 were collected, and the cell membrane protein and cytoplasmic protein was separated prior for

484 Western blotting analysis. The density of His-tagged GPR17 in cell cytoplasmic fraction was  
485 normalized to that of GAPDH, and the density of GPR17 in membrane fraction was normalized  
486 that of Na<sup>+</sup>-K<sup>+</sup> ATPase. Both the membrane expressing and the cytoplasmic expressing proteins  
487 were normalized to the relative control (without UDP-glucose treatment) blotted on the same  
488 membrane.

489

490

#### 491 **FLIM-FRET measurement**

492 To perform fluorescence lifetime imaging microscopy, we used GFP as FRET donor and  
493 mCherry as FRET acceptor. The GFP was either fused to the N-terminal of GPR17 or labeled at  
494 one of the three extracellular loops (ECLs) using split GFP strategy as described previously  
495 (*Jiang et al., 2016*). For the internal labeling of GPR17 using the split-GFP stratagem, the last  
496 two  $\beta$ -strands of GFP are site-specifically inserted, with four glycine residues flanking the  
497 inserted strands for flexibility of the fluorophore. The four pairs of fluorescent donor-acceptor  
498 pairs are listed in Table 1.

499 HEK 293 cells were transfected with donor plasmid alone (for donor only control) or co-  
500 transfected with both donor and acceptor plasmids (at DNA ratio of 1:1). 6 hours after  
501 transfection, cells were passed into 24-well plates with glass coverslips at the bottom, and were  
502 cultured for another 24 hours. For split GFP labeling, the cells were incubated with 2  $\mu$ M GFP<sub>(1-</sub>  
503 <sub>9)</sub>, a fragment comprising the first 9  $\beta$ -strands of GFP, in PBS buffer at 37 °C for 20 min. Excess  
504 GFP<sub>(1-9)</sub> fragment was removed by washing twice with PBS. The cells were then fixed with  
505 freshly prepared 4% paraformaldehyde at 37 °C for 10 min. The cover slides with fixed cells

506 were mounted on the glass slides with an anti-fade medium containing DAPI (Invitrogen,  
507 Carlsbad, CA, USA). The fluorescence intensities of donor and acceptor were determined with  
508 an A1 confocal laser-scanning microscope (Nikon, Tokyo, Japan). Images were obtained by  
509 sequential excitation at 488 nm for GFP, 561 nm for mCherry and 465nm for DAPI, respectively.

510 Fluorescence lifetime of donor fluorophore without or with the acceptor fluorophore present  
511 was evaluated with an A1 confocal laser-scanning microscope equipped with a time correlated  
512 single photon counting (TCSPC) module (PicoQuant, Berlin, Germany). The donor was excited  
513 at 485 nm using a picosecond pulsed with a diode laser (LDH-P-C-485B, PicoQuant, Germany)  
514 at 40 MHz repetition rate, and a 60× oil objective was used for detection. The TCSPC decay  
515 curves were fitted with single exponential using the SymphoTime 64 software (PicoQuant,  
516 Germany), and the lifetime of each pixel was determined automatically. The lifetime image of  
517 each pixel was given a pseudo-color according to the lifetime fitted. For each individual cell, the  
518 GFP-positive membrane was selected as the region of interest (ROI), and the lifetime of each  
519 pixel within ROI was averaged. The averaged lifetime determined from multiple cells was used  
520 for the calculation of inter-protomer FRET distances.

521 FRET efficiencies ( $E$ ) were calculated using the following equation. Here,  $E$  represents  
522 energy transfer efficiency;  $\tau_D$  and  $\tau_{DA}$  are the lifetime values of donor fluorophore in the absence  
523 and presence of the acceptor, respectively.

$$E = 1 - \frac{\tau_{DA}}{\tau_D}$$

524 The distance between donor and acceptor was converted from FRET efficiency using the  
525 following equation. Here,  $E$  represents FRET efficiency,  $R_0$  is the Förster distance at which the  
526 energy transfer efficiency is 50 %, and  $r$  is the distance between the donor and the acceptor.

$$E = \frac{1}{1 + \left(\frac{r}{R_0}\right)^6}$$

527 FRET distances were thus converted from FLIM lifetime measurements using GFP-  
528 mCherry Förster distance of 51 Å (*Albertazzi et al., 2009; Akrap et al., 2010; Ding et al., 2017*)  
529 and assuming  $\kappa^2=2/3$ . The FRET efficiencies and FRET distances are listed in Supplementary  
530 Table 1.

### 531 **Evaluation GPR17 internalization using split-GFP labelling approach**

532 The GFP<sub>(10-11)</sub> was introduced after R291 of the wildtype or mutant GPR17  
533 (GPR17/R291:GFP<sub>(10-11)</sub>), and the resulting plasmid was transfected to HEK293 cells. Two days  
534 after transfection, cells were washed with PBS and were incubated with 2 μM GFP<sub>(1-9)</sub> for 20 min  
535 37 °C, with the excess GFP<sub>(1-9)</sub> washed off. The cells were cultured in DMEM with 10% fetal  
536 bovine serum for another 24 hours, in the presence or absence of 100 μM UDP-glucose. The  
537 cells were fixed by fresh prepared 4% paraformaldehyde, and mounted with an anti-fade medium  
538 containing DAPI. Imaging was taken by using the A1 confocal laser-scanning microscope, and  
539 the fluorescent intensity for a cross section of a single cell were analyzed by NIS-Elements AR  
540 software (Nikon, Tokyo, Japan).

### 541 **Evaluation of the activation of ERK1/2 by Western blotting**

542 One day after transfection with wildtype or mutant GPR17, cells were serum starved by  
543 switching to HBS buffer (10 mM HEPES, 4 mM KCl, 140 mM NaCl, 2 mM MgSO<sub>4</sub>, 1 mM  
544 KH<sub>2</sub>PO<sub>4</sub>, PH 7.4) for 12 h. The cells were stimulated with 100 μM UDP-glucose for 5 min at  
545 37 °C. The cells were then washed twice with ice-cold PBS buffer. RIPA lysis buffer (Beyotime  
546 Biotechnology, Shanghai, China) was carefully pipetted onto the well containing the adherent  
547 cultured cells. The cells were scraped off and were transferred to a microcentrifuge tube. Cell  
548 debris was removed by centrifugation at 10,000 g for 10 min at 4 °C. After quantifying protein

549 concentration, 50  $\mu\text{g}$  of the cell extracts were used for Western blotting analysis. The primary  
550 antibody included mouse anti-phospho-ERK1/2 polyclonal antibody (Cell Signaling Technology,  
551 Boston, USA, 1:1000) and rabbit anti-ERK1/2 polyclonal antibodies (Cell Signaling Technology,  
552 Boston, USA, 1:1000). The ratio of phospho-ERK1/2 over ERK1/2 indicates the activation of  
553 ERK1/2.

#### 554 **Intracellular $\text{Ca}^{2+}$ -level measurement**

555 HEK293 cells were cultured in 96 well plate, and were transfected with wildtype and mutant  
556 GPR17 plasmids as pIRES2-EGFP/GPR17-His. This plasmid can express GFP17 and GFP  
557 separately, and GFP can be used as a proxy for the expression level of GPR17. The net increase  
558 of Rhod-2 fluorescence intensity was normalized to the GFP expression level, which indicates  
559 intracellular  $\text{Ca}^{2+}$ -level. 24 h after transfection, cells were incubated with 4  $\mu\text{M}$  Rhod-2 (Life  
560 technologies, Eugene, USA) for 30 min at 37  $^{\circ}\text{C}$  in humidified air with 5%  $\text{CO}_2$ . The cells were  
561 then cultured with a balanced salt solution (137 mM NaCl, 5.36 mM KCl, 1.26 mM  $\text{CaCl}_2$ , 0.81  
562 mM  $\text{MgSO}_4\cdot\text{H}_2\text{O}$ , 0.34 mM  $\text{Na}_2\text{HPO}_4\cdot 7\text{H}_2\text{O}$ , 0.44 mM  $\text{KH}_2\text{PO}_4$ , 4.17 mM  $\text{NaHCO}_3$ , 10 mM  
563 HEPES, and 2.02 mM glucose, pH 7.4) for another 30 min at 37  $^{\circ}\text{C}$ . The fluorescence intensity  
564 was read using appropriate wavelength settings (excitation at 550 nm, emission at 581 nm for  
565 Rhod-2; excitation at 485 nm, emission at 512 nm for GFP as expression control) on a microplate  
566 reader (Perkin-Elmer, Waltham, USA). 20, 100 and 500  $\mu\text{M}$  UDP-glucose was applied  
567 sequentially, and the change of fluorescent intensity was measured continuously at 1 second  
568 intervals.

#### 569 **Cell-based cAMP assay**

570 Intracellular cAMP levels were measured using bioluminescence resonance energy transfer  
571 (BRET) assay as previously described (*Jiang et al., 2007*). Briefly, cells were co-transfected

572 with the BRET-based cAMP biosensor CAMYEL (50 ng) and pcDNA3.1/HA-GPR17 (50 ng) or  
573 the mutant GPR17 plasmids (50 ng) per well in 96-well white plate (Thermo Scientific,  
574 Denmark). One day after transfection, cells were washed twice with PBS and incubated with 5  
575  $\mu\text{M}$  coelenterazine H (Promega, Madison, USA) for 5 min 37 °C. 2  $\mu\text{M}$  Forskolin (Sigma-  
576 Aldrich, St. Louis, MO, USA) was added to stimulate adenylyl cyclase and was incubated with  
577 the cells for 5 min, in the absence or presence of 1 mM UDP-glucose. Luminescence emissions  
578 at 530 and 485 nm were measured using a Mithras LB 940 (Berthold, Bad Wildbad, Germany),  
579 and the BRET signal was presented as the 530/485 ratio.

### 580 **Statistical Analysis**

581 The graphs and statistical data analyses were performed using GraphPad Prism 6.0 software. The  
582 results were expressed as mean  $\pm$  SD for the FLIM-FRET data and mean  $\pm$  SEM for other data.  
583  $p < 0.05$  was considered statistically significant. The experiment repeat, as well as detailed  
584 statistical information including the number of experiments, p-values, definition of error bars, (t,  
585 df) and 95% CI of difference is listed in individual figure legends.

### 586 **Modeling of GPR17 protomer structure**

587 The structure of GPR17 protomer was predicted using with threading modeling using the I-  
588 TASSER server (*Roy et al., 2010*), with the distance restraints from coevolution analysis  
589 generated with GREMLIN (*Ovchinnikov et al., 2014*). Five GPR17 models were provided by the  
590 online server with the RMSD of 0.6 Å. The GPR17 protomer structure was then subjected to MD  
591 simulations. The lipid-bilayer membrane environment was built using CHARMM-GUI Lipid  
592 Builder server (*Jo et al., 2008*). 64 DOPC molecules were inserted to either lower or upper leaflet  
593 of the bilayer and the starting thickness of the system is  $\sim 17.5$  Å. 150 mM NaCl was added to the  
594 system. The MD simulations were performed using AMBER14 (*Case et al., 2014*). The

595 structural model was first minimized, and the system including protein, lipids, water, and ions  
596 was gradually heated. After a 5-ns equilibration, MD simulation was performed for the system  
597 for a total of 400 ns at 303 K. The temperature was controlled using Langevin thermostat while  
598 the pressure is controlled using anisotropic Berendsen barostat. The long-range electrostatics was  
599 treated with Particle Mesh Ewald method (*Essmann et al., 1995*), and the van der Waals was  
600 truncated at 10 Å. Three predicted models from I-TASSER with best scores were used to  
601 perform MD simulations. These models appear stable, as their coordinates quickly stabilized  
602 with only minor adjustments. Hence, we treated the structure model of the protomer as a rigid  
603 body when building the dimer structure.

604

605

#### 606 **Modeling GPR17 dimer structure**

607 To assess the conformational space of fluorescent protein, mCherry (PDB code 2H5Q) and GFP  
608 (PDB code 2B3P) were inserted at specific sites, and were treated as rigid bodies. The GPR17  
609 residues at the insertion site (the N-terminus, ECL1 after residue 128, ECL2 after residue 214, or  
610 ECL3 after residue 291), the C-terminal flexible residues of mCherry (residues 222-223), the  
611 loop residues at both N- and C-terminal ends of the inserted  $\beta$ -strands of GFP (residues 197-198  
612 and 229-232), and the additionally inserted glycine residues flanking the inserted  $\beta$ -strands, were  
613 given full torsion angle freedom. All possible conformations of the engineered mCherry and GFP  
614 tags were randomized using in Xplor-NIH software package (*Schwieters et al., 2018*). The  
615 fluorescent proteins were found to take up a large conformational space with respect to GPR17,  
616 without clashing with GPR17 or with the lipid bilayer. The geometric center of all possible

617 positions of the fluorophore at a particular insertion site was calculated, and the averaged  
618 position was used for the application of FLIM-FRET distance restraints (Fig. 3a).

619 The modeling of GPR17 dimer was performed using Xplor-NIH. The coordinates for  
620 GPR17 along with the pseudo-atoms for the averaged center-of-mass of the inserted fluorophores  
621 were duplicated. The two protomers of GPR17 were enforced with a rotational dimer symmetry.  
622 FRET distance restraints were applied to the pairs of pseudo-atoms (doubled for the  $C_2$   
623 symmetry), and a ellipsoidal radius-of-gyration restraint (*Schwieters and Clore, 2008*) was  
624 applied for the compactness of the dimer. The calculation was performed with simulated  
625 annealing refinement similar to previously described protocol (*Ding et al., 2017*), and was  
626 repeated multiple times with different relative positions/orientations for the two protomers. The  
627 obtained GPR17 dimer structure was subjected to MD simulations to assess the stability of the  
628 coordinates, with 128 DOPC molecules were inserted to either inner or outer leaflet of the lipid  
629 bilayer. PyMOL was used to render structural figures, and to introduce point mutations for  
630 subsequent simulations (The PyMOL Molecular Graphics System, Version 2.2 Schrödinger,  
631 LLC.).

### 632 **Assessment of dimer stability with steered MD**

633 We performed adaptive steered molecular dynamics simulations (ASMD) to obtain the energy  
634 difference between the two interacting protomers and two non-interacting separated protomers.  
635 The RMS deviation and distance between the centers-of mass was calculated using the PTRAJ  
636 module in AMBER14. The starting conformation is obtained from the last snapshot of the  
637 regular MD simulations as described above. The distance between the  $C\alpha$  atoms of D105  
638 (located at the opposite side of the dimer interface) in GPR17 protomers were used for ASMD  
639 simulations, which starts from  $\sim 44$  Å to a target value of 54 Å. The velocity of ASMD is 0.5



640 Å/ns, and the simulations runs for a total 20 ns. The potential mean of force (PMF) was  
641 calculated, which gives the work needed to disrupt the dimer.  
642

## 643 References

- 644 Akrap N, Seidel T, Barisas BG. 2010. Forster distances for fluorescence resonant energy transfer  
645 between mCherry and other visible fluorescent proteins. *Anal Biochem* **402**:105-106.  
646 doi:10.1016/j.ab.2010.03.026.
- 647 Albertazzi L, Arosio D, Marchetti L, Ricci F, Beltram F. 2009. Quantitative FRET analysis with  
648 the EGFP-mCherry fluorescent protein pair. *Photochem Photobiol* **85**:287-297.  
649 doi:10.1111/j.1751-1097.2008.00435.x.
- 650 Baltoumas FA, Theodoropoulou MC, Hamodrakas SJ. 2016. Molecular dynamics simulations  
651 and structure-based network analysis reveal structural and functional aspects of G-protein  
652 coupled receptor dimer interactions. *J Comput Aided Mol Des* **30**:489-512.  
653 doi:10.1007/s10822-016-9919-y.
- 654 Becker W. 2012. Fluorescence lifetime imaging--techniques and applications. *J Microsc*  
655 **247**:119-136. doi:10.1111/j.1365-2818.2012.03618.x.
- 656 Berezin MY, Achilefu S. 2010. Fluorescence lifetime measurements and biological imaging.  
657 *Chem Rev* **110**:2641-2684. doi:10.1021/cr900343z.
- 658 Bonfanti E, Gelosa P, Fumagalli M, Dimou L, Vigano F, Tremoli E, Cimino M, Sironi L,  
659 Abbracchio MP. 2017. The role of oligodendrocyte precursor cells expressing the GPR17  
660 receptor in brain remodeling after stroke. *Cell Death Dis* **8**:e2871.  
661 doi:10.1038/cddis.2017.256.
- 662 Buccioni M, Marucci G, Dal Ben D, Giacobbe D, Lambertucci C, Soverchia L, Thomas A,  
663 Volpini R, Cristalli G. 2011. Innovative functional cAMP assay for studying G protein-  
664 coupled receptors: application to the pharmacological characterization of GPR17. *Purinergic*  
665 *Signal* **7**:463-468. doi:10.1007/s11302-011-9245-8.
- 666 Calebiro D, Rieken F, Wagner J, Sungkaworn T, Zabel U, Borzi A, Cocucci E, Zurn A, Lohse  
667 MJ. 2013. Single-molecule analysis of fluorescently labeled G-protein-coupled receptors  
668 reveals complexes with distinct dynamics and organization. *Proc Natl Acad Sci U S A*  
669 **110**:743-748. doi:10.1073/pnas.1205798110.
- 670 Calebiro D, Sungkaworn T. 2018. Single-Molecule Imaging of GPCR Interactions. *Trends*  
671 *Pharmacol Sci* **39**:109-122. doi:10.1016/j.tips.2017.10.010.
- 672 Capra V, Mauri M, Guzzi F, Busnelli M, Accomazzo MR, Gaussem P, Nisar SP, Mundell SJ,  
673 Parenti M, Rovati GE. 2017. Impaired thromboxane receptor dimerization reduces signaling  
674 efficiency: A potential mechanism for reduced platelet function in vivo. *Biochem Pharmacol*  
675 **124**:43-56. doi:10.1016/j.bcp.2016.11.010.
- 676 Case D, Babin V, Berryman J, Betz R, Cai Q, Cerutti D, Cheatham Iii T, Darden T, Duke R,  
677 Gohlke H. 2014. Amber 14.
- 678 Ciana P, Fumagalli M, Trincavelli ML, Verderio C, Rosa P, Lecca D, Ferrario S, Parravicini C,  
679 Capra V, Gelosa P, Guerrini U, Belcredito S, Cimino M, Sironi L, Tremoli E, Rovati GE,  
680 Martini C, Abbracchio MP. 2006. The orphan receptor GPR17 identified as a new dual uracil  
681 nucleotides/cysteinyl-leukotrienes receptor. *EMBO J* **25**:4615-4627.  
682 doi:10.1038/sj.emboj.7601341.

- 683 Daniele S, Trincavelli ML, Fumagalli M, Zappelli E, Lecca D, Bonfanti E, Campiglia P,  
684 Abbracchio MP, Martini C. 2014. Does GRK-beta arrestin machinery work as a "switch on"  
685 for GPR17-mediated activation of intracellular signaling pathways? *Cell Signal* **26**:1310-1325.  
686 doi:10.1016/j.cellsig.2014.02.016.
- 687 Daniele S, Trincavelli ML, Gabelloni P, Lecca D, Rosa P, Abbracchio MP, Martini C. 2011.  
688 Agonist-induced desensitization/resensitization of human G protein-coupled receptor 17: a  
689 functional cross-talk between purinergic and cysteinyl-leukotriene ligands. *J Pharmacol Exp*  
690 *Ther* **338**:559-567. doi:10.1124/jpet.110.178715.
- 691 Denisov IG, Sligar SG. 2017. Nanodiscs in Membrane Biochemistry and Biophysics. *Chem Rev*  
692 **117**:4669-4713. doi:10.1021/acs.chemrev.6b00690.
- 693 Ding YH, Gong Z, Dong X, Liu K, Liu Z, Liu C, He SM, Dong MQ, Tang C. 2017. Modeling  
694 Protein Excited-state Structures from "Over-length" Chemical Cross-links. *J Biol Chem*  
695 **292**:1187-1196. doi:10.1074/jbc.M116.761841.
- 696 Ecke D, Hanck T, Tulapurkar ME, Schafer R, Kassack M, Stricker R, Reiser G. 2008. Hetero-  
697 oligomerization of the P2Y11 receptor with the P2Y1 receptor controls the internalization and  
698 ligand selectivity of the P2Y11 receptor. *Biochem J* **409**:107-116. doi:10.1042/BJ20070671.
- 699 Essmann U, Perera L, Berkowitz ML, Darden T, Lee H, Pedersen LG. 1995. A Smooth Particle  
700 Mesh Ewald Method. *Journal of Chemical Physics* **103**:8577-8593. doi:10.1063/1.470117.  
701
- 702 Faklaris O, Cottet M, Falco A, Villier B, Laget M, Zwier JM, Trinquet E, Mouillac B, Pin JP,  
703 Durroux T. 2015. Multicolor time-resolved Forster resonance energy transfer microscopy  
704 reveals the impact of GPCR oligomerization on internalization processes. *FASEB J* **29**:2235-  
705 2246. doi:10.1096/fj.14-260059.
- 706 Garcia-Nafria J, Nehme R, Edwards PC, Tate CG. 2018. Cryo-EM structure of the serotonin 5-  
707 HT1B receptor coupled to heterotrimeric Go. *Nature* **558**:620-623. doi:10.1038/s41586-018-  
708 0241-9.
- 709 Ge B, Lao J, Li J, Chen Y, Song Y, Huang F. 2017. Single-molecule imaging reveals  
710 dimerization/oligomerization of CXCR4 on plasma membrane closely related to its function.  
711 *Sci Rep* **7**:16873. doi:10.1038/s41598-017-16802-7.
- 712 Gibert A, Lehmann M, Wiesner B, Schüle R (2017). The monomer/homodimer equilibrium of  
713 G protein-coupled receptors: formation in the secretory pathway and potential functional  
714 significance. G-Protein-Coupled Receptor Dimers. K. Herrick-Davis, G. Milligan and G. Di  
715 Giovanni. Cham, Switzerland, Humana Press: 359-384.
- 716 Greife A, Felekyan S, Ma Q, Gertzen CG, Spomer L, Dimura M, Peulen TO, Wohler C,  
717 Haussinger D, Gohlke H, Keitel V, Seidel CA. 2016. Structural assemblies of the di- and  
718 oligomeric G-protein coupled receptor TGR5 in live cells: an MFIS-FRET and integrative  
719 modelling study. *Sci Rep* **6**:36792. doi:10.1038/srep36792.
- 720 Guo H, An S, Ward R, Yang Y, Liu Y, Guo XX, Hao Q, Xu TR. 2017. Methods used to study  
721 the oligomeric structure of G-protein-coupled receptors. *Biosci Rep* **37**.  
722 doi:10.1042/BSR20160547.

- 723 Gurevich VV, Gurevich EV. 2018. GPCRs and Signal Transducers: Interaction Stoichiometry.  
724 *Trends Pharmacol Sci* **39**:672-684. doi:10.1016/j.tips.2018.04.002.
- 725 Hauser AS, Chavali S, Masuho I, Jahn LJ, Martemyanov KA, Gloriam DE, Babu MM. 2018.  
726 Pharmacogenomics of GPCR Drug Targets. *Cell* **172**:41-54 e19.  
727 doi:10.1016/j.cell.2017.11.033.
- 728 Hebert TE, Moffett S, Morello JP, Loisel TP, Bichet DG, Barret C, Bouvier M. 1996. A peptide  
729 derived from a beta2-adrenergic receptor transmembrane domain inhibits both receptor  
730 dimerization and activation. *J Biol Chem* **271**:16384-16392. doi: 10.1074/jbc.271.27.16384.
- 731 Hern JA, Baig AH, Mashanov GI, Birdsall B, Corrie JE, Lazareno S, Molloy JE, Birdsall NJ.  
732 2010. Formation and dissociation of M1 muscarinic receptor dimers seen by total internal  
733 reflection fluorescence imaging of single molecules. *Proc Natl Acad Sci U S A* **107**:2693-  
734 2698. doi:10.1073/pnas.0907915107.
- 735 Isberg V, de Graaf C, Bortolato A, Cherezov V, Katritch V, Marshall FH, Mordalski S, Pin JP,  
736 Stevens RC, Vriend G, Gloriam DE. 2015. Generic GPCR residue numbers - aligning  
737 topology maps while minding the gaps. *Trends Pharmacol Sci* **36**:22-31.  
738 doi:10.1016/j.tips.2014.11.001.
- 739 Ito T, Oshita S, Nakabayashi T, Sun F, Kinjo M, Ohta N. 2009. Fluorescence lifetime images of  
740 green fluorescent protein in HeLa cells during TNF-alpha induced apoptosis. *Photochem*  
741 *Photobiol Sci* **8**:763-767. doi:10.1039/b902341k.
- 742 Jastrzebska B, Chen Y, Orban T, Jin H, Hofmann L, Palczewski K. 2015. Disruption of  
743 Rhodopsin Dimerization with Synthetic Peptides Targeting an Interaction Interface. *J Biol*  
744 *Chem* **290**:25728-25744. doi:10.1074/jbc.M115.662684.
- 745 Jiang LI, Collins J, Davis R, Lin KM, DeCamp D, Roach T, Hsueh R, Rebres RA, Ross EM,  
746 Taussig R, Fraser I, Sternweis PC. 2007. Use of a cAMP BRET sensor to characterize a novel  
747 regulation of cAMP by the sphingosine 1-phosphate/G13 pathway. *J Biol Chem* **282**:10576-  
748 10584. doi:10.1074/jbc.M609695200.
- 749 Jiang WX, Dong X, Jiang J, Yang YH, Yang J, Lu YB, Fang SH, Wei EQ, Tang C, Zhang WP.  
750 2016. Specific cell surface labeling of GPCRs using split GFP. *Sci Rep* **6**:20568.  
751 doi:10.1038/srep20568.
- 752 Jo S, Kim T, Iyer VG, Im W. 2008. CHARMM-GUI: a web-based graphical user interface for  
753 CHARMM. *J Comput Chem* **29**:1859-1865. doi:10.1002/jcc.20945.
- 754 Kasai RS, Kusumi A. 2014. Single-molecule imaging revealed dynamic GPCR dimerization.  
755 *Curr Opin Cell Biol* **27**:78-86. doi:10.1016/j.ceb.2013.11.008.
- 756 Koehl A, Hu H, Feng D, Sun B, Zhang Y, Robertson MJ, Chu M, Kobilka TS, Laeremans T,  
757 Steyaert J, Tarrasch J, Dutta S, Fonseca R, Weis WI, Mathiesen JM, Skiniotis G, Kobilka BK.  
758 2019. Structural insights into the activation of metabotropic glutamate receptors. *Nature*  
759 **566**:79-84. doi:10.1038/s41586-019-0881-4.
- 760 Lambert NA, Javitch JA. 2014. CrossTalk opposing view: Weighing the evidence for class A  
761 GPCR dimers, the jury is still out. *J Physiol* **592**:2443-2445.  
762 doi:10.1113/jphysiol.2014.272997.

- 763 Lohse MJ. 2010. Dimerization in GPCR mobility and signaling. *Curr Opin Pharmacol* **10**:53-58.  
764 doi:10.1016/j.coph.2009.10.007.
- 765 Longo PA, Kavran JM, Kim MS, Leahy DJ. 2013. Transient mammalian cell transfection with  
766 polyethylenimine (PEI). *Methods Enzymol* **529**:227-240. doi:10.1016/B978-0-12-418687-  
767 3.00018-5.
- 768 Lu C, Dong L, Zhou H, Li Q, Huang G, Bai SJ, Liao L. 2018. G-Protein-Coupled Receptor  
769 Gpr17 Regulates Oligodendrocyte Differentiation in Response to Lysolecithin-Induced  
770 Demyelination. *Sci Rep* **8**:4502. doi:10.1038/s41598-018-22452-0.
- 771 Manglik A, Kruse AC, Kobilka TS, Thian FS, Mathiesen JM, Sunahara RK, Pardo L, Weis WI,  
772 Kobilka BK, Granier S. 2012. Crystal structure of the micro-opioid receptor bound to a  
773 morphinan antagonist. *Nature* **485**:321-326. doi:10.1038/nature10954.
- 774 Marucci G, Dal Ben D, Lambertucci C, Santinelli C, Spinaci A, Thomas A, Volpini R, Buccioni  
775 M. 2016. The G Protein-Coupled Receptor GPR17: Overview and Update. *ChemMedChem*  
776 **11**:2567-2574. doi:10.1002/cmdc.201600453.
- 777 Maurel D, Comps-Agrar L, Brock C, Rives ML, Bourrier E, Ayoub MA, Bazin H, Tinel N,  
778 Durroux T, Prezeau L, Trinquet E, Pin JP. 2008. Cell-surface protein-protein interaction  
779 analysis with time-resolved FRET and snap-tag technologies: application to GPCR  
780 oligomerization. *Nat Methods* **5**:561-567. doi:10.1038/nmeth.1213.
- 781 McMillin SM, Heusel M, Liu T, Costanzi S, Wess J. 2011. Structural basis of M3 muscarinic  
782 receptor dimer/oligomer formation. *J Biol Chem* **286**:28584-28598.  
783 doi:10.1074/jbc.M111.259788.
- 784 Milligan G, Ward RJ, Marsango S. 2019. GPCR homo-oligomerization. *Curr Opin Cell Biol*  
785 **57**:40-47. doi:10.1016/j.ceb.2018.10.007.
- 786 Muto T, Tsuchiya D, Morikawa K, Jingami H. 2007. Structures of the extracellular regions of the  
787 group II/III metabotropic glutamate receptors. *Proc Natl Acad Sci U S A* **104**:3759-3764.  
788 doi:10.1073/pnas.0611577104.
- 789 Ovchinnikov S, Kamisetty H, Baker D. 2014. Robust and accurate prediction of residue-residue  
790 interactions across protein interfaces using evolutionary information. *Elife* **3**:e02030.  
791 doi:10.7554/eLife.02030.
- 792 Pandey-Szekeres G, Munk C, Tsonkov TM, Mordalski S, Harpoe K, Hauser AS, Bojarski AJ,  
793 Gloriam DE. 2018. GPCRdb in 2018: adding GPCR structure models and ligands. *Nucleic  
794 Acids Res* **46**:D440-D446. doi:10.1093/nar/gkx1109.
- 795 Romei MG, Boxer SG. 2019. Split Green Fluorescent Proteins: Scope, Limitations, and Outlook.  
796 *Annu Rev Biophys.* doi:10.1146/annurev-biophys-051013-022846.
- 797 Roy A, Kucukural A, Zhang Y. 2010. I-TASSER: a unified platform for automated protein  
798 structure and function prediction. *Nat Protoc* **5**:725-738. doi:10.1038/nprot.2010.5.
- 799 Schwieters CD, Bermejo GA, Clore GM. 2018. Xplor-NIH for molecular structure determination  
800 from NMR and other data sources. *Protein Sci* **27**:26-40. doi:10.1002/pro.3248.

- 801 Schwieters CD, Clore GM. 2008. A pseudopotential for improving the packing of ellipsoidal  
802 protein structures determined from NMR data. *J Phys Chem B* **112**:6070-6073.  
803 doi:10.1021/jp076244o.
- 804 Shen Z, Yang X, Chen Y, Shi L. 2018. CAPA periviscerokinin-mediated activation of  
805 MAPK/ERK signaling through Gq-PLC-PKC-dependent cascade and reciprocal ERK  
806 activation-dependent internalized kinetics of Bom-CAPA-PVK receptor 2. *Insect Biochem*  
807 *Mol Biol* **98**:1-15. doi:10.1016/j.ibmb.2018.04.007.
- 808 Smith TH, Li JG, Dores MR, Trejo J. 2017. Protease-activated receptor-4 and purinergic receptor  
809 P2Y12 dimerize, co-internalize, and activate Akt signaling via endosomal recruitment of beta-  
810 arrestin. *J Biol Chem* **292**:13867-13878. doi:10.1074/jbc.M117.782359.
- 811 Stenkamp RE. 2018. Identifying G protein-coupled receptor dimers from crystal packings. *Acta*  
812 *Crystallogr D Struct Biol* **74**:655-670. doi:10.1107/S2059798318008136.
- 813 Suhling K, Siegel J, Phillips D, French PM, Leveque-Fort S, Webb SE, Davis DM. 2002.  
814 Imaging the environment of green fluorescent protein. *Biophys J* **83**:3589-3595.  
815 doi:10.1016/S0006-3495(02)75359-9.
- 816 Sun Y, Rombola C, Jyothikumar V, Periasamy A. 2013. Forster resonance energy transfer  
817 microscopy and spectroscopy for localizing protein-protein interactions in living cells.  
818 *Cytometry A* **83**:780-793. doi:10.1002/cyto.a.22321.
- 819 Ward RJ, Xu TR, Milligan G. 2013. GPCR oligomerization and receptor trafficking. *Methods*  
820 *Enzymol* **521**:69-90. doi:10.1016/B978-0-12-391862-8.00004-1.
- 821 Xiang J, Chun E, Liu C, Jing L, Al-Sahouri Z, Zhu L, Liu W. 2016. Successful Strategies to  
822 Determine High-Resolution Structures of GPCRs. *Trends Pharmacol Sci* **37**:1055-1069.  
823 doi:10.1016/j.tips.2016.09.009.
- 824 Xue L, Rovira X, Scholler P, Zhao H, Liu J, Pin JP, Rondard P. 2015. Major ligand-induced  
825 rearrangement of the heptahelical domain interface in a GPCR dimer. *Nat Chem Biol* **11**:134-  
826 140. doi:10.1038/nchembio.1711.  
827  
828  
829

830 **Figure legends**

831 **Figure 1.** GPR17 dimerizes in mouse tissues and in HEK293 cells. (a) Western blotting analysis  
832 of GPR17 from mouse lung under denaturing conditions. 100 µg protein sample each was  
833 prepared with 8% SDS sample buffer and was boiled for 5 min before loading. (b) Western  
834 blotting analysis of GPR17 from mouse heart, liver, lung and kidney under non-denaturing  
835 conditions. 100 µg protein sample each was prepared with SDS-free sample buffer and loaded  
836 without boiling. Experiment was repeated for two times. (c) Western blotting analysis of His-  
837 and HA-tagged GPR17 proteins in cell lysate under non-denaturing conditions. Samples (100  
838 µg each) were prepared from HEK293 cells co-transfected with His- and HA-tagged GPR17.  
839 Experiment was repeated for two times. (d) Western blotting analysis of His- and HA-tagged  
840 GPR17 proteins in Ni-NTA agarose affinity-purified sample under non-denaturing condition (50  
841 µg each). The protein samples were purified by using Ni-NTA agarose from His- and HA-tagged  
842 GPR17 co-transfected HEK293 cells. Experiment was repeated for two times.

843 **Figure 2.** FLIM-FRET measures GPR17 inter-protomer distances in cell membrane. (a)  
844 Fluorescence labeling scheme used for FLIM-FRET measurement. Fluorescence acceptor  
845 mCherry is fused at the N-terminus, while fluorescence donor GFP is introduced either at the N-  
846 terminus or one of the extracellular loops (ECL1-3) using a split GFP stratagem. (b)  
847 Representative images showing fluorescent intensity and fluorescent lifetime with GFP (green)  
848 inserted at ECL3 of GPR17 with and without mCherry (red) co-expressed. (c) The lifetime of  
849 GFP determined from individual HEK293 cells. “*donor only*” means the lifetime of GFP in cells  
850 express GFP-tagged GPR17 only. “*donor:acceptor*” means the lifetime of GFP in cells co-  
851 express both GFP- and mCherry-tagged GPR17. Mean ± SD. The n value was denoted in the  
852 figure under each cluster. Unpaired *t*-test was used for the statistical analysis, and the p value as

853 well as (t, df) were denoted above each cluster. (d) Averaged FRET efficiencies for the four pairs  
854 of fluorophores, determined from the decrease of GFP fluorescence lifetime shown in (c). (e)  
855 The averaged FRET distances, converted from (d) using a Förster distance of 5.1 nm.

856 **Figure 2—figure supplement 1.** The conformational space of the fluorescent protein tagged at  
857 GPR17. (a) A representative structure of GFP inserted at ECL2 of GPR17. The GFP (PDB code  
858 2B3P) was inserted with a split-GFP stratagem, in which the two C-terminal  $\beta$ -strands were  
859 engineered after GPR17 residue R214. Four glycine residues, colored yellow, flank each side the  
860 insertion. The GFP 1-9  $\beta$ -stands were added to the cells to complement the already inserted  
861 strands and to regenerate fluorescence. The GFP and the GPR17 are shown as green and cyan  
862 cartoon, respectively. (b) The inserted GFP protein takes up multiple conformations with respect  
863 to GPR17. Therefore, the effect of orientation factor  $\kappa^2$  on FRET efficiency is likely small. With  
864 the conformations clashing with the membrane excluded, vectors are drawn from residue R214  
865 to the center-of-mass of GFP in all possible conformations. The averaged position, shown as  
866 sphere, is used for subsequent modeling of dimer structure. Note that mCherry (PDB code 2H5Q)  
867 is appended at the flexible N-terminus of GPR17, which can also sample a large conformational  
868 space.

869 **Figure 3.** Modeling the structure of GPR17 homo-dimer in cell membrane allows the  
870 identification of key interfacial residues. (a) GPR17 dimer structure modeled from inter-  
871 protomer FLIM-FRET distances in two orthogonal perspectives. The centers-of-mass of the  
872 mCherry and GFP fluorophores are shown as red and green spheres, respectively. The  
873 transmembrane helices 5 (TM5) at the dimer interface are colored yellow, and the side chains of  
874 F229 and F233 in TM5 are shown as spheres. (b, c) MD simulations of wildtype and  
875 F229A/F233A mutant of GPR17 dimer, showing the RMS deviation (RMSD) of the C $\alpha$  atoms



876 (b), and concurrent separation between the two protomers, i.e. the distance between the centers-  
877 of-mass of each GPR17 (c). (d) Steered MD simulations of wildtype and mutant GPR17 dimers.  
878 The potential mean force indicates the energetic differences along the reaction coordinate  
879 between initial dimeric and final monomeric states. (e) RMS deviations of C $\alpha$  atoms of wildtype  
880 and disulfide-bonded dimeric mutant of GPR17 during MD simulations.

881 **Figure 3—figure supplement 1.** Modeling of GPR17 protomer structure. (a) Coevolution of  
882 residues of GPR17 analyzed using GREMLIN. The larger dots indicate the higher strength in  
883 covariance. Coevolution means that the two residues are likely in proximity with each other,  
884 which is used as weak distance restraints. (b) Structural models of GPR17 protomer built with I-  
885 TASSER. The three predicted models have an RMS differences of 0.61 Å. (c) MD simulation of  
886 GPR17 protomer, with sufficient amount of lipid molecules built around the protein, with water  
887 molecules placed on top and bottom of the lipid bilayer, and with periodic boundary conditions  
888 enforced. (d) RMS deviations of the C $\alpha$  atoms using the three predicted models as the starting  
889 coordinates. After some small initial adjustment, all the structural models stabilize. (e)  
890 Superposition of input model and the model generated after 400 ns simulation, with the  
891 backbone RMS difference stabilizing to 2.2 Å.

892 **Figure 3—figure supplement 2.** Flowchart for modeling GPR17 dimer structure, which  
893 comprises six steps. 1) Modeling of the protomer structure was performed with I-TASSER with  
894 the threading of homolog structures, and with additional input of coevolution restraints generated  
895 with GREMLIN. 2) The structural models from I-TASSER were evaluated for stability and  
896 rigidity with MD simulations using AMBER14 software package. 3) Fluorescent proteins, sfGFP  
897 or mCherry, were built into the GPR17 protomer structure, with the positions of the fluorophore  
898 with respect to GPR17 fully sampled. 4) With the averaged position of the center-of-mass of the

899 fluorophore calculated, and with the GPR17 protomer treated as a rigid body, the GPR17 dimer  
900 structure was refined with simulated annealing in Xplor-NIH suite, so as to satisfy all FRET  
901 distance restraints between the fluorophores in the two neighboring protomers. 5) The dimer  
902 structure was further assessed with MD simulation for stability. 6) Interfacial mutations were  
903 rationally designed based on the dimer structure, and the functions of forced GPR17  
904 monomer/dimer were evaluated.

905 **Figure 3—figure supplement 3.** The dimer structure of GPR17 is stable in lipid bilayer. (a)  
906 GPR17 dimer structure is subjected to MD simulation. In this case, more lipid molecules are  
907 built around the protein, resulting in a larger periodic box than in the simulation for GPR17  
908 protomer. The N-terminal extracellular tail is removed, thus to decrease the water molecules  
909 required at the top and bottom of the lipid bilayer. (b, c) After some initial adjustment, the  
910 GPR17 dimer structure stabilizes. This is characterized by similar RMS deviation of backbone  
911 C $\alpha$  atoms for the dimer and for the protomer (b), and nearly constant distances between the  
912 centers-of-mass of the two protomers and of the two transmembrane helices 5 (TM5) (c). (d)  
913 Superposition of the initial input structure built with Xplor-NIH, and final MD simulated  
914 structure generated with AMBER14, affording an overall backbone RMS difference of 3.05 Å.

915 **Figure 3—figure supplement 4.** F229A/F233A mutations destabilizes GPR17 dimer. (a) With  
916 alanine mutations introduced *in silico*, the fluctuation of coordinates during MD simulations of  
917 the mutant GPR17 protomer, as characterized by the RMS deviations of backbone C $\alpha$  atoms, is  
918 comparable to that of wildtype GPR17 protomer. (b) The RMS deviations of the coordinates is  
919 much larger for the mutant GPR17 dimer, and gradually increases.

920 **Figure 3—figure supplement 5.** Cysteine mutation to F229 or F233 makes GPR17 dimeric.  
921 With F229 (a) or F233 (b) mutated to cysteine, the two GPR17 protomers form a disulfide-linked

922 covalent dimer. The mutant GPR17 dimer remains stable during MD simulations, and the  
923 backbone RMS deviations are comparable with those of GPR17 protomer. This means the  
924 fluctuation of the dimer coordinates mainly arises mainly from within each protomer.

925 **Figure 4.** TM5 residue F229 is essential for GPR17 dimerization. (a) The fluorescence lifetime  
926 of GFP tagged at ECL3 of GPR17 measured with FLIM-FRET. For F229A/F233A mutant, no  
927 difference was observed between “*donor only*” and “*donor:acceptor*”. Mean  $\pm$  SD. The n value  
928 denoted in the figure under each cluster. Unpaired *t*-test was used for the statistical analysis, and  
929 the p value and the (t, df) were denoted in the figure above each cluster. (b) Western blotting  
930 analysis of His-tagged wildtype and mutant GPR17 proteins expressing in HEK293 cells. 100  $\mu$ g  
931 membrane protein was used for analysis. Experiment was repeated for three times. (c) Effect of  
932 UDP glucose on the monomer/dimer ratio between wildtype and F229A/F233A mutant of  
933 GPR17. The cells were treated without or with 0.1 mM UDP-glucose for 30 min before  
934 harvesting. 100  $\mu$ g of cell lysate was used for analysis. Mean  $\pm$  SEM (*Figure 4—source data 1*).  
935 n=11. \*\*\*p<0.001, compared with GPR17-WT control, the 95% CI of difference was (-0.179 to  
936 -0.0566) for the control GPR17/F299A/F233A and (-0.175 to -0.0526) for the UDP-glucose  
937 treated GPR17/F299A/F233A. ####p<0.001 compared with UDP-glucose treated GPR17-WT, the  
938 95% CI of difference was (-0.168 to -0.0456) for the control GPR17/F299A/F233A and (-0.164  
939 to -0.0416) for the UDP-glucose treated GPR17/F299A/F233A. One-way ANOVA followed by  
940 Tukey’s multiple comparisons test was used. p=0.0022 and F(3,28)=6.249 for all group. (d, e)  
941 Western blotting analysis using anti-His or anti-HA antibodies for GPR17 proteins extracted  
942 from the cell lysate (d) and in Ni-NTA agarose purified sample (e), respectively. His- and HA-  
943 tagged wildtype or mutant GPR17 were co-transfected into HEK293 cells. The GPR17(WT) and  
944 GPR17/F229A/F233A constructs were repeated for two more times.

945 **Figure 5.** Forced GPR17 monomer and dimer exhibit distinct signaling functions. (a)  
946 Representative curves showing BRET ratio of net change, indicative of intracellular cAMP level,  
947 upon the administration of forskalin with or without UDP-glucose treatment to GPR17-  
948 transfected cells. (b) Statistical analysis of the maximal net change of BRET ratio in (a). mean  $\pm$   
949 SEM (*Figure 5—source data 1*). n=6 for each group; \* $P < 0.05$ , \*\* $P < 0.01$ , \*\*\* $P < 0.001$ ,  
950 unpaired *t*-test. The value of (t, df) was listed under the histogram bar. (c-e) Fluorescence  
951 intensity curves with the sequential administration of 0.02, 0.1 and 0.5 mM UDP-glucose to  
952 GPR17-transfected cells, which indicates the intracellular  $Ca^{2+}$ -levels. For each construct, four  
953 curves were recorded for cells from separate wells. The thick curve is the average from four  
954 individual curves. The baseline of the curve was adjusted to the similar intensity at 3000. The  
955 expression of GPR17 was normalized by the intensity of co-expressed GFP. (f) Statistical  
956 analysis of the maximal increase of intracellular  $Ca^{2+}$ -level induced with the addition of 0.5 mM  
957 UDP-glucose. mean  $\pm$  SEM (*Figure 5—source data 2*). n=4. \*\*\* $P < 0.001$ , compared with  
958 control, the 95% CI of difference was (1660 to 2539) for GPR17(WT), (902.5 to 1781) for  
959 GPR17/F233A, (1540 to 2419) for GPR17/229C and (1482 to 2361) for GPR17/F233C;  
960  $####P < 0.001$ , compared with GPR17 (WT) transfected cells, the 95% CI of difference was (1677  
961 to 2555) for GPR17/229A, (1458 to 2336) for GPR17/F233A and (318.9 to 1197) for  
962 GPR17/F233A. One-way ANOVA followed by Tukey's multiple comparisons test was used,  
963 with  $p < 0.001$  and  $F(6, 21) = 105.3$  for all group. (g) Representative images of Western blotting of  
964 unphosphorylated and phosphorylated ERK1/2 upon the administration of UDP glucose. (h)  
965 Statistical analysis of the ratio of p-ERK over ERK, which indicates the activation of ERK1/2.  
966 mean  $\pm$  SEM (*Figure 5—source data 3*). n=3; \*\*\* $P < 0.001$ , compared with non-transfected

967 control, the 95% CI of difference was (-1.511 to 0.4890) for GPR17(WT), (-0.5692 to 0.4528)  
968 for GPR17/F233A, (-0.8096 to 0.2125) for GPR17/229C and (-1.548 to -0.5255) for  
969 GPR17/F233C; ### $P < 0.01$ , ### $P < 0.001$ , compared with cells transfected with wildtype GPR17,  
970 the 95% CI of difference was (0.4308 to 1.453) for GPR17/229A/F233A and (0.1904 to 1.212)  
971 for GPR17/F209A. One-way ANOVA followed by Tukey's multiple comparisons test was used,  
972 with p value  $< 0.001$  and  $F(6, 14) = 20.17$ .

973 **Figure 5—figure supplement 1.** Assessment of wildtype or mutant GPR17 expression levels in  
974 HEK293 cells. Wildtype and mutant GPR17 genes were cloned into pIRES2-EGFP vector and  
975 were transfected into HEK293 cells. The pIRES2 is a bicistronic vector that allows simultaneous  
976 expression of GPR17 and GFP from the same mRNA transcript. Thus, fluorescence  
977 measurements from the GFP can be used as a proxy for the expression levels of GPR17 proteins.  
978 24 hours after transient transfection of the plasmid, intracellular GFP fluorescence was read at  
979 488 nm excitation and 510 nm emission. Mean  $\pm$  SEM (*Figure 5—source data 2*).  $n = 4$ . One-  
980 way ANOVA followed by Tukey's multiple comparisons test was used, with p value  $= 0.0192$   
981 and  $F(6, 21) = 254.0$ .

982 **Figure 6.** The impact of dimer interface mutations on agonist-induced receptor internalization. (a)  
983 Representative Western blot of His-tagged GPR17 and GPR17/F229A/F233A with or without  
984 the treatment of 0.1 mM UDP-glucose. Membrane proteins (M) and plasma proteins (P) were  
985 prepared separately. (b, c) Statistical analyses of membrane and cytoplasmic proteins for cells  
986 treated with or without UDP-glucose for 24 hr. The intensity of cytoplasmic GRP17 is  
987 normalized to that of GAPDH, and the intensity of cell membrane GPR17 was normalized to that  
988 of  $\text{Na}^+ - \text{K}^+$  ATPase. Mean  $\pm$  SEM (*Figure 6—source data 1*).  $n = 8$ ; unpaired  $t$ -test. The p value

989 and (t, df) was listed in the figure above the bar. (d) Sectional analysis of fluorescence intensity  
990 for cells transfected with GPR17 and labeled with split-GFP. GFP fluorescence was initially  
991 observed at the membrane without UDP-glucose, and depending on the GPR17 construct, could  
992 be visualized inside the cells following the treatment of UDP-glucose. Experiment was repeated  
993 for three times.

994 **Figure 6—figure supplement 1.** Representative images of HEK293 cells expressing GFP-  
995 tagged GPR17. The cells were transiently transfected with wildtype or mutant GPR17 gene,  
996 which carries an insertion of the C-terminal two  $\beta$ -strands of GFP at specific site. 24 hours after  
997 the transfection, a fragment comprising GFP  $\beta$ -strands 1-9 was added and was incubated with the  
998 cells for 20 minutes. This GFP fragment complements the  $\beta$ -strands already inserted in GPR17  
999 expressing at cell membrane and generates GFP fluorescence at the cell surface. The cells were  
1000 then treated with or without UDP-glucose for 24 hours, and the GFP fluorescence images were  
1001 captured. The micrographs indicate the internalization of GFP-tagged GPR17 receptors, except  
1002 for F229A and F229A/F233A mutants.

1003 **Figure 7.** Residues equivalent to F229 in GPR17 is important for the dimerization of several  
1004 other GPCRs. (a, b) Western blot analysis of  $\mu$  receptor in cell lysate (a) and in Ni-NTA agarose  
1005 purified sample (b), respectively. (c, d) Western blot analysis of CysLT<sub>1</sub> in cell lysate (c) and in  
1006 Ni-NTA agarose purified sample (d), respectively. (e, f) Western blot analysis of CysLT<sub>2</sub> in cell  
1007 lysate and in Ni-NTA agarose purified sample, respectively. 100  $\mu$ g samples of cell lysate and 50  
1008  $\mu$ g of purified samples were used for Western blotting analysis under non-denature condition.  
1009 All experiments were repeated for two times.

1010 **Figure 7—figure supplement 1.** MD simulation analysis of  $\mu$ -opioid receptor dimer. (a) The  $\mu$ -  
1011 opioid receptor has been captured as a dimer in the crystal (PDB structure 4DKL), which also

1012 utilizes TM5/6 as the dimer interface. The two protomers are arranged along the crystal  $C_2$   
1013 symmetry axis. (b) MD simulation of  $\mu$ -opioid receptor dimer shows that the RMS deviations of  
1014 the  $C\alpha$  atoms become larger upon the F239A mutation. (c) Steered MD simulation shows that  
1015 interfacial mutation F239A makes  $\mu$ -opioid receptor dimer less stable by  $\sim 2$  kcal/mol.

1016 **Figure 8.** Schematic illustration of the signals of the G-proteins coupled with wildtype and  
1017 F229A mutant of GPR17 receptors.

1018

1019

**a**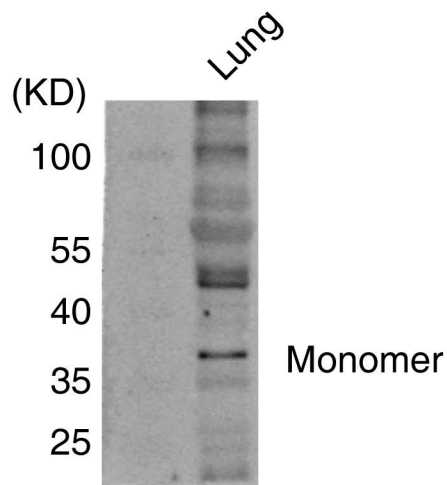**b**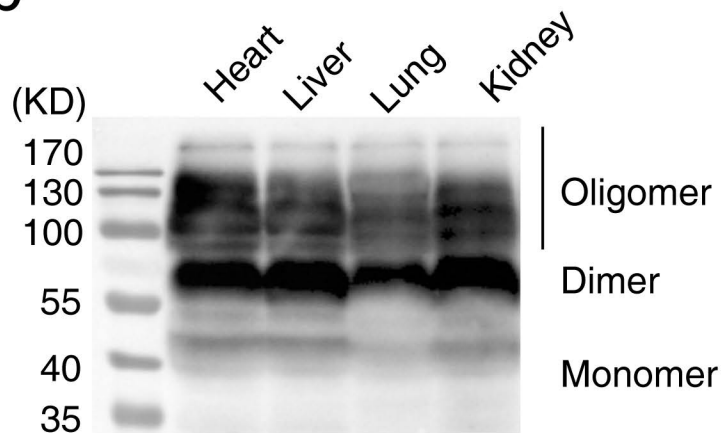**c**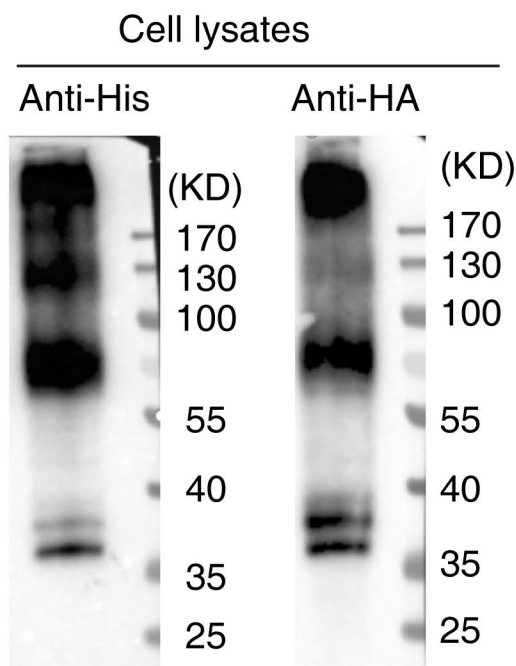**d**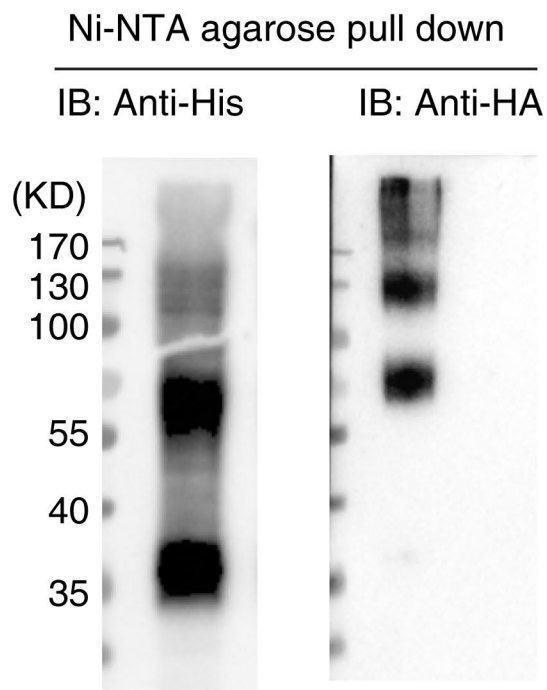



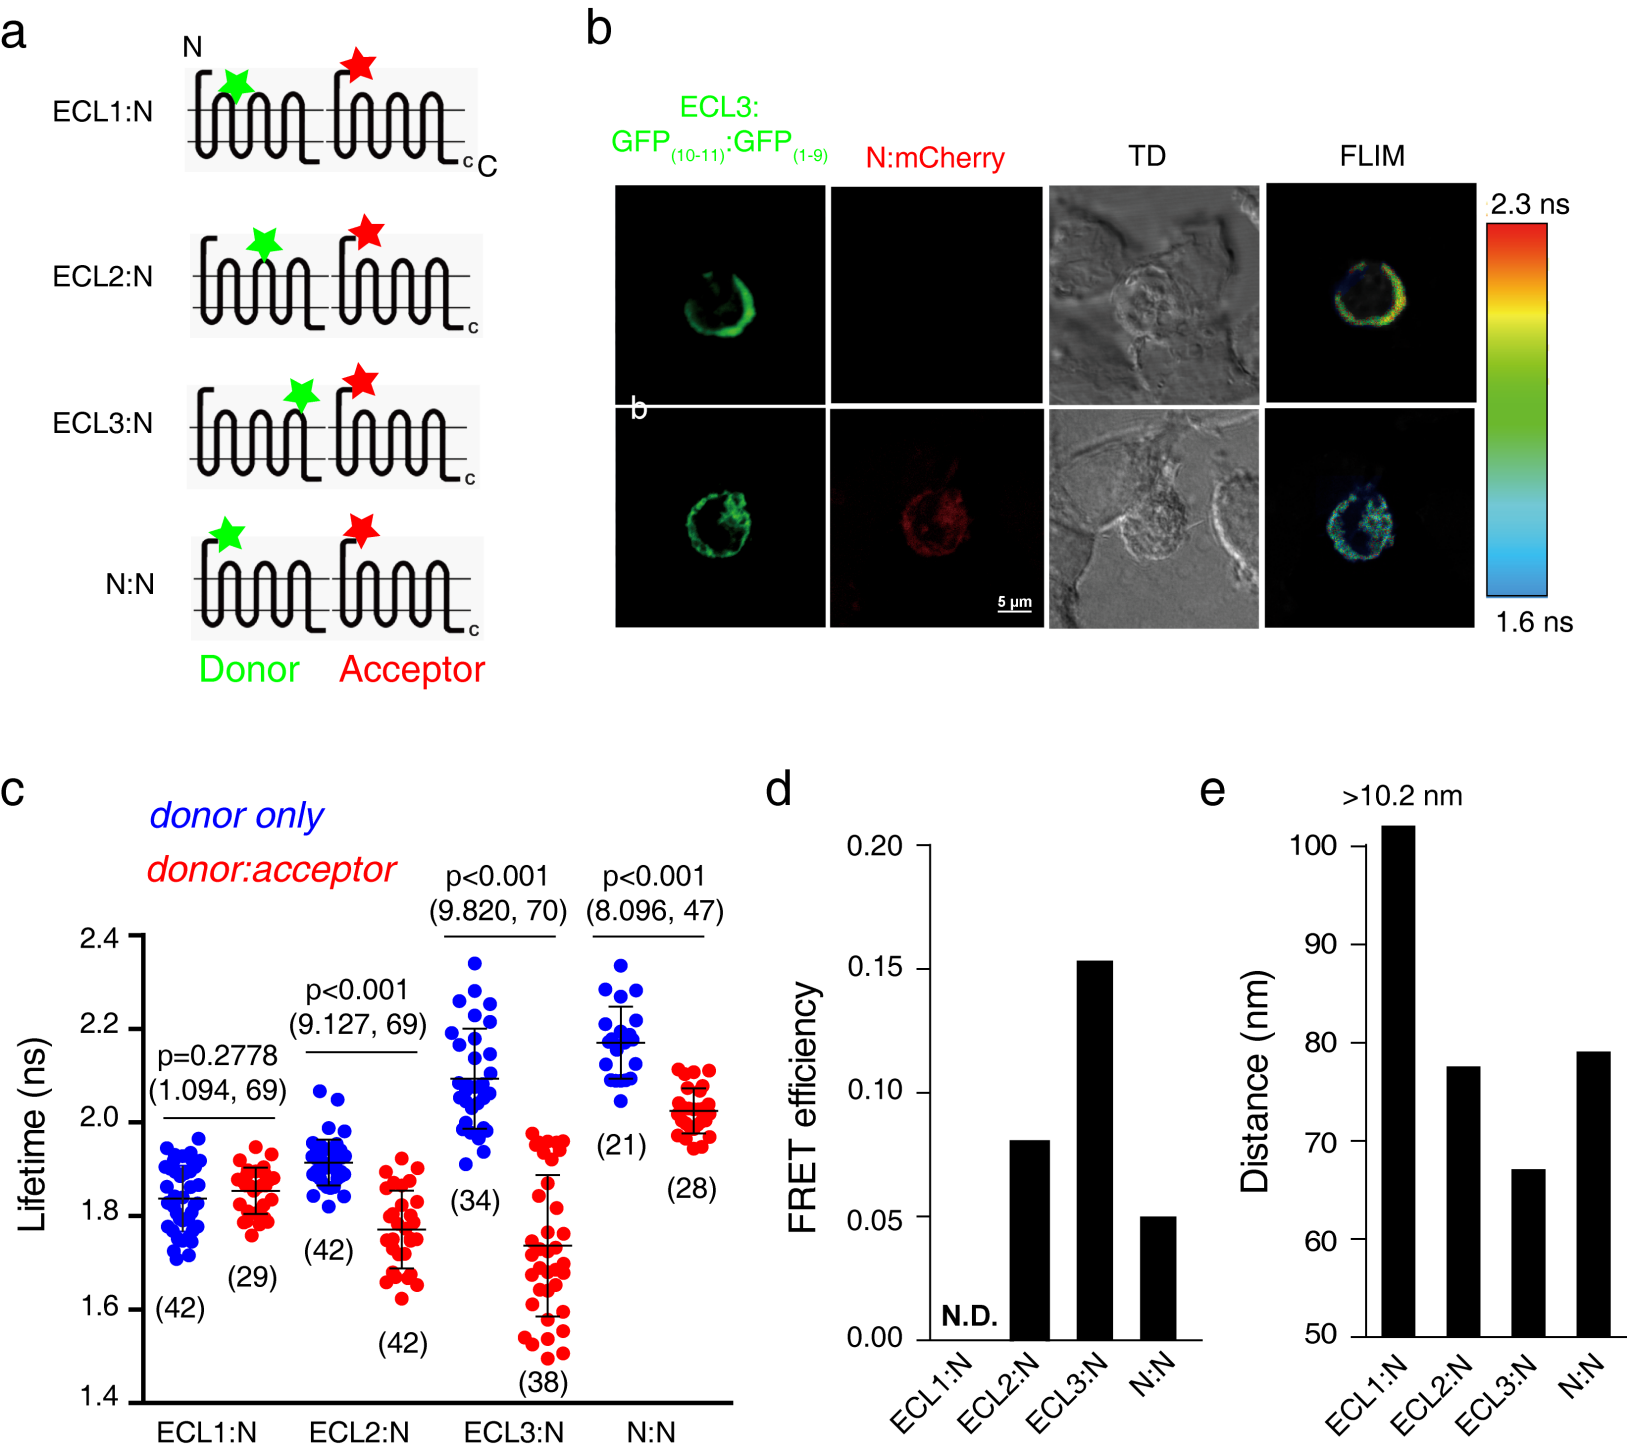

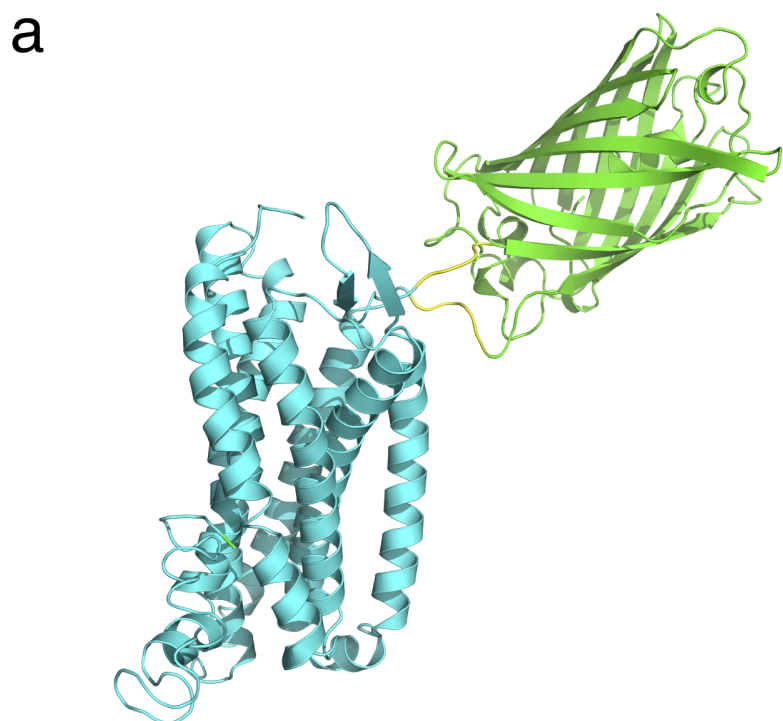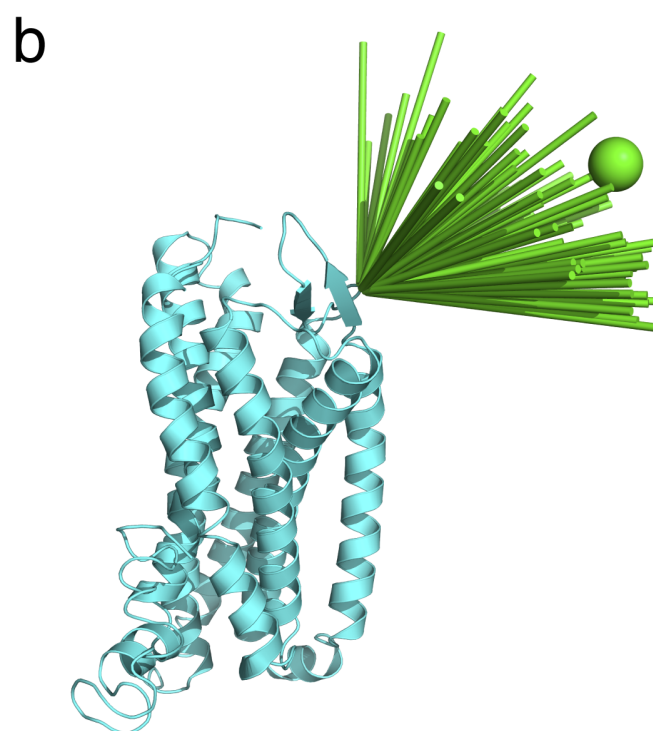

**a**

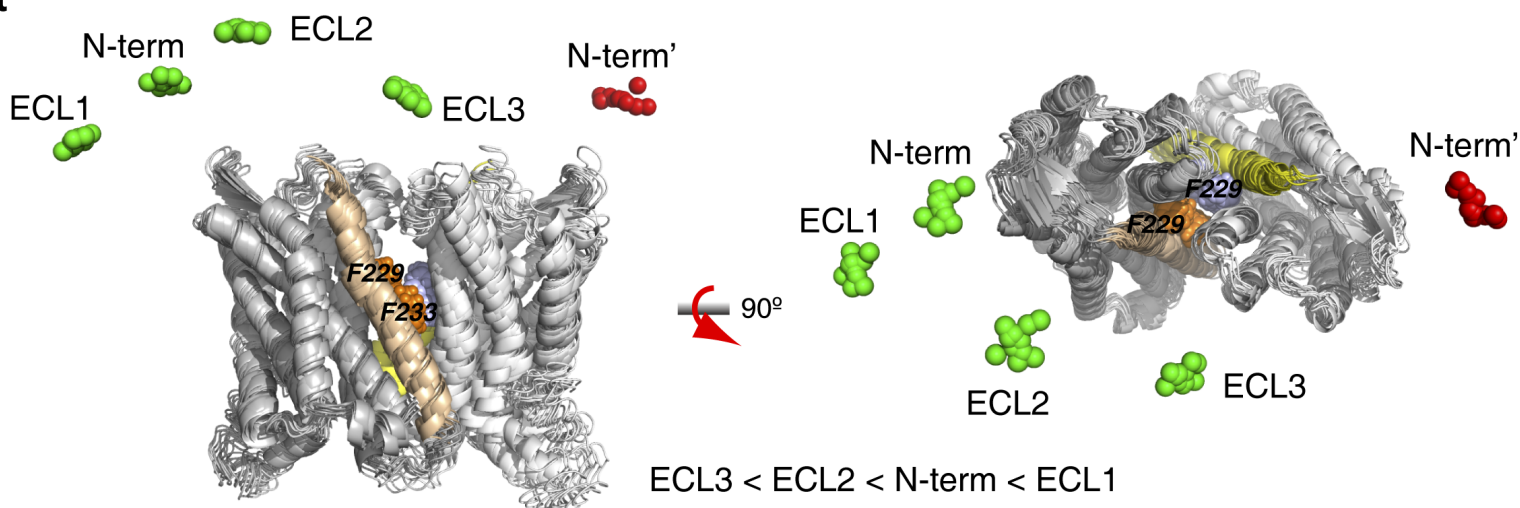

**b**

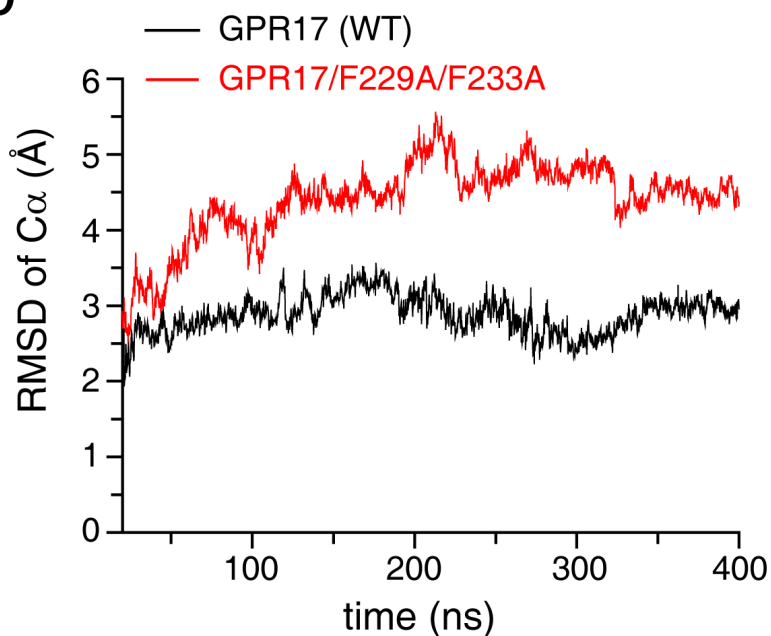

**c**

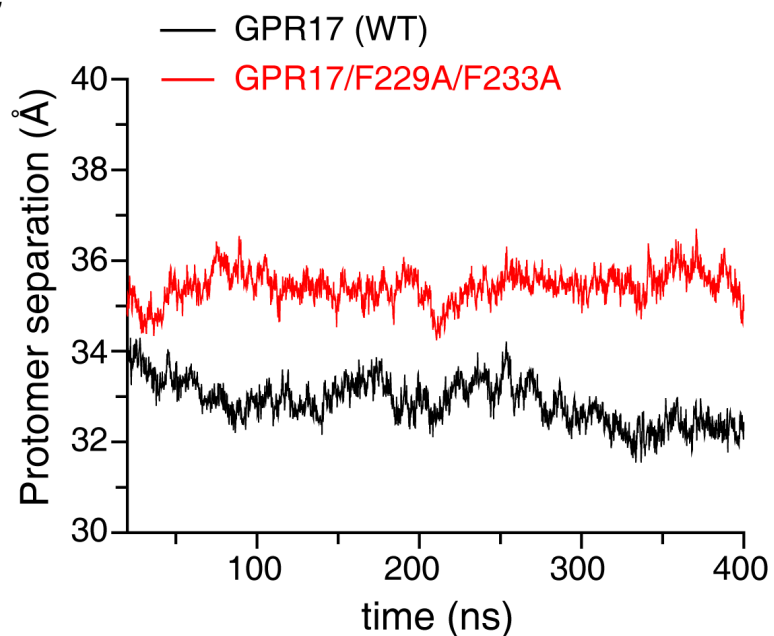

**d**

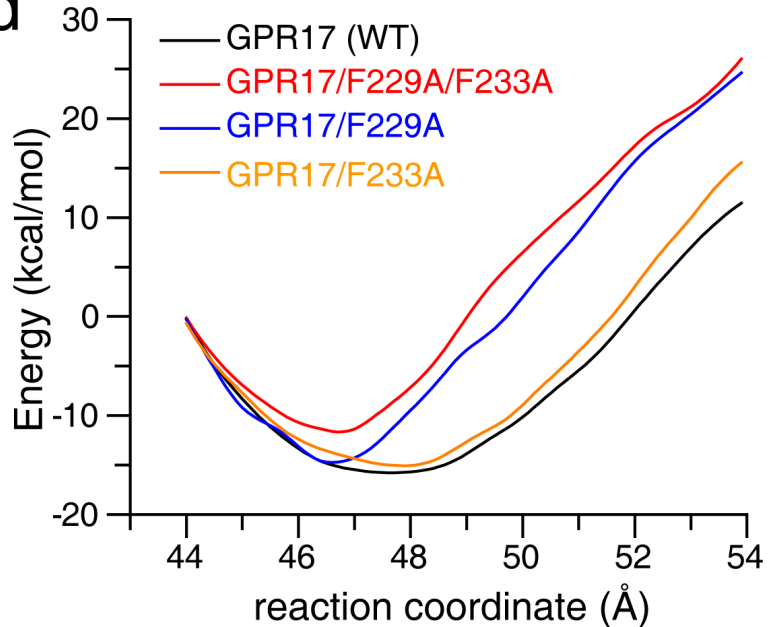

**e**

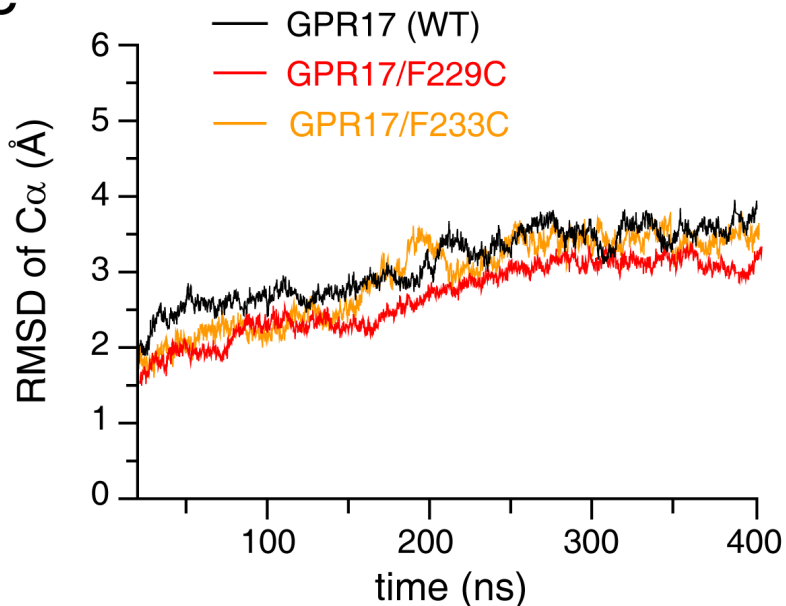

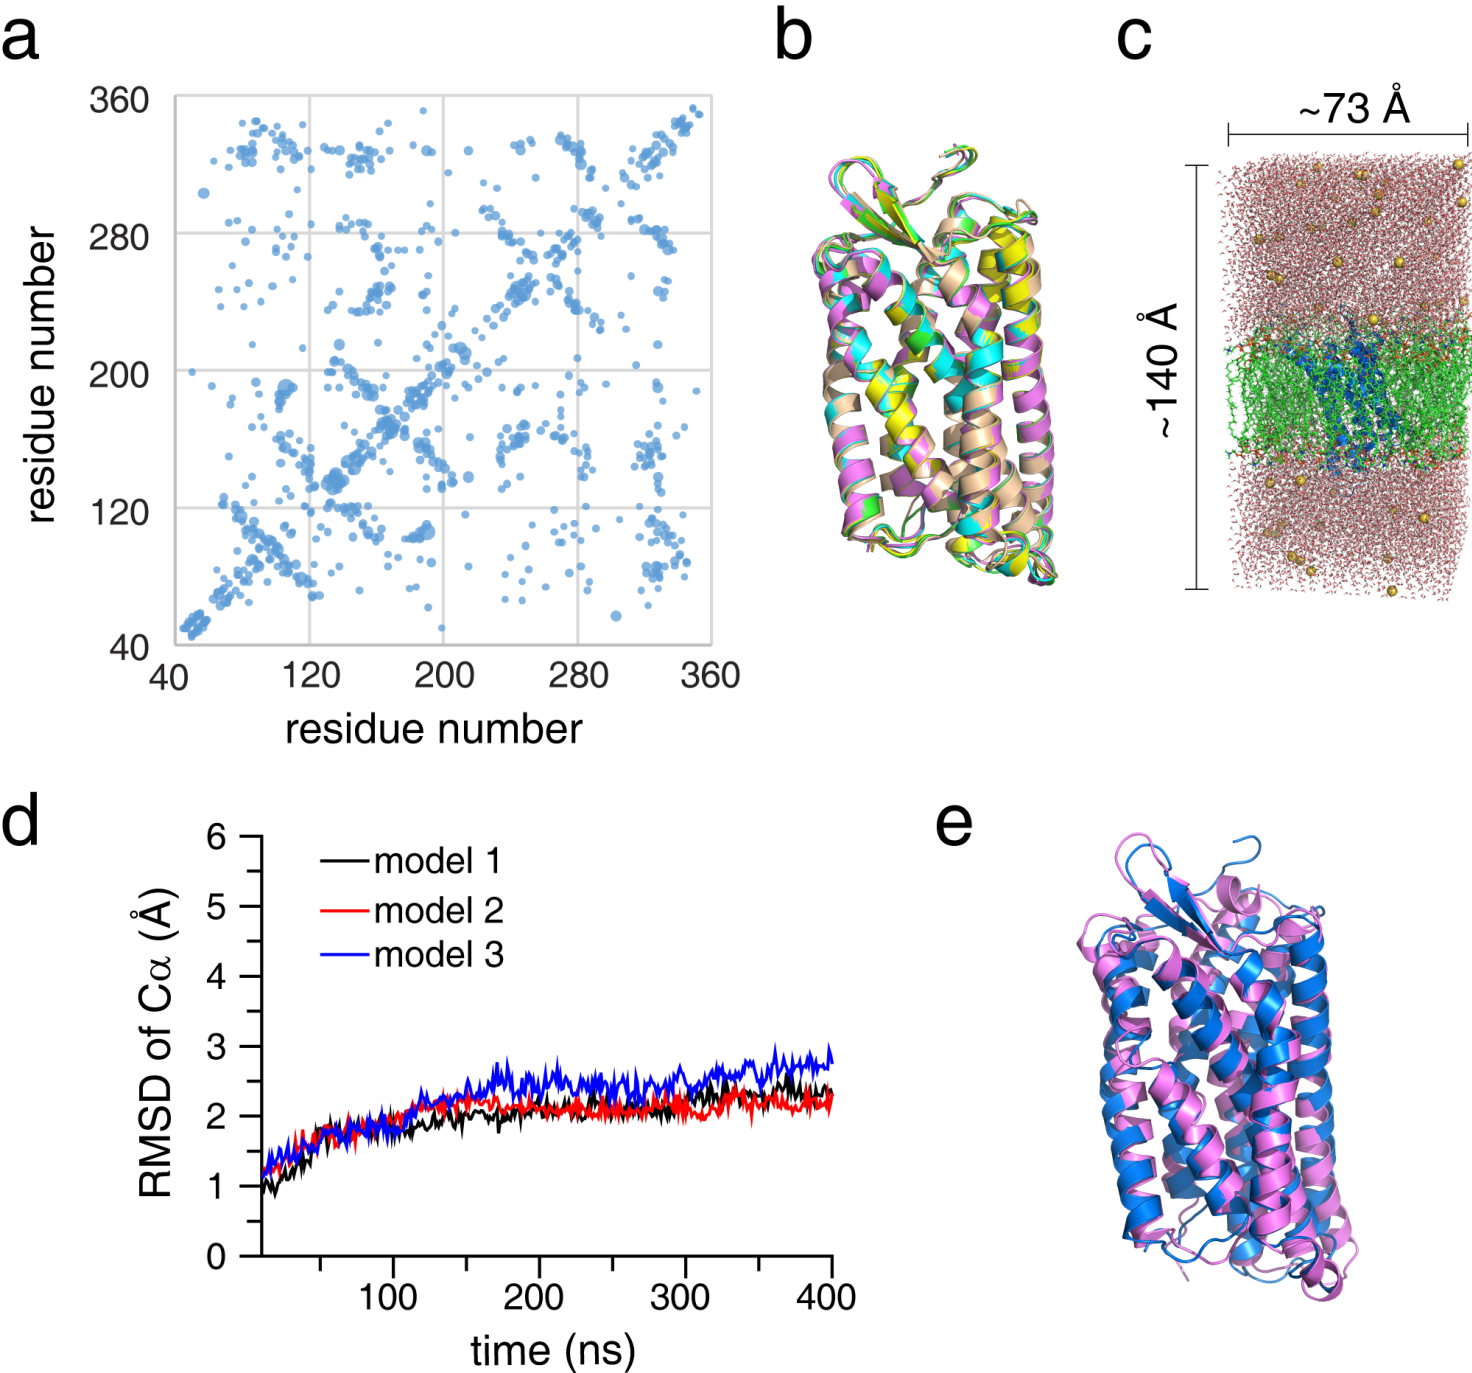

①

*Threading modeling of  
GPR17 monomer structure*

bioRxiv preprint doi: <https://doi.org/10.1101/664094>; this version posted June 7, 2019. The copyright holder for this preprint (which was not certified by peer review) is the author/funder, who has granted bioRxiv a license to display the preprint in perpetuity. It is made available under aCC-BY 4.0 International license.

②

MD simulation to evaluate  
monomer structure

③

*Evaluate the conformational  
space of fluorescent tags*

④

*Simulated annealing to  
generate GPR17 dimer structure*

⑤

MD simulation to evaluate  
dimer structure

⑥

*Mutational analysis and  
functional dissection*

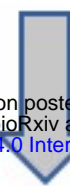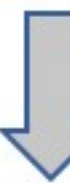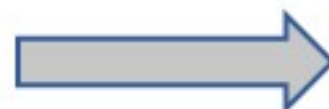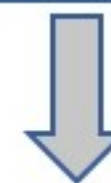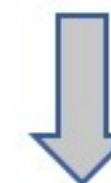

**a**

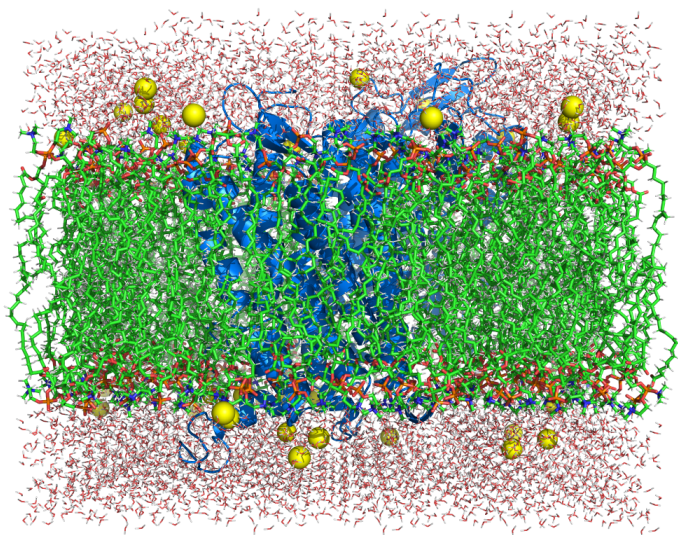

**b**

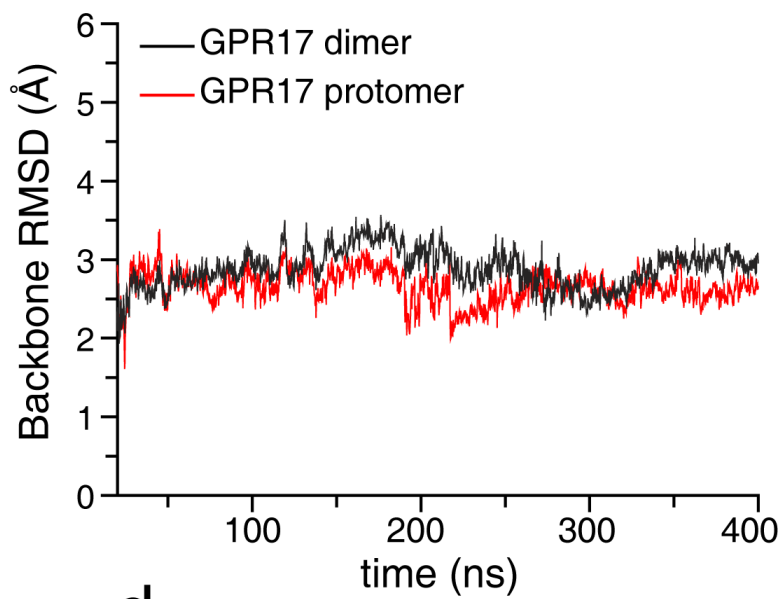

**c**

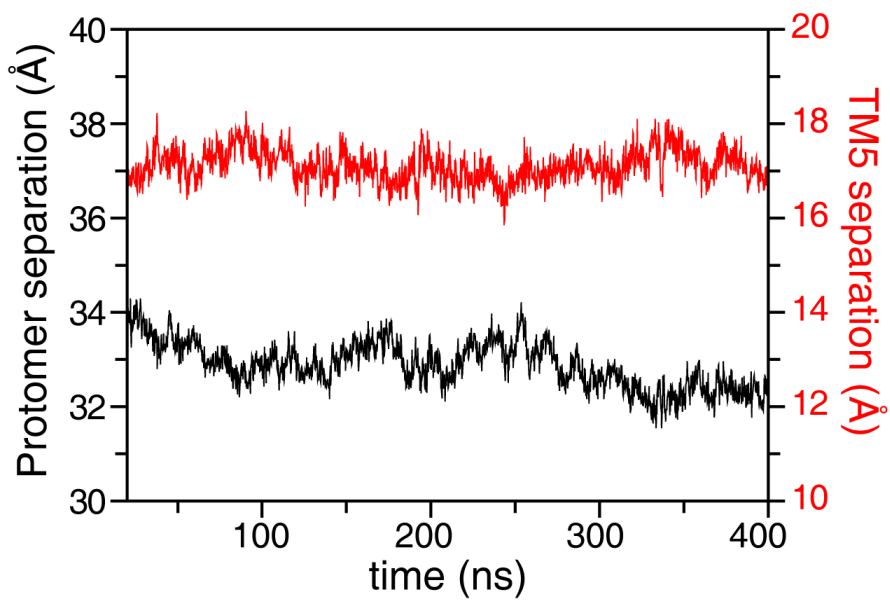

**d**

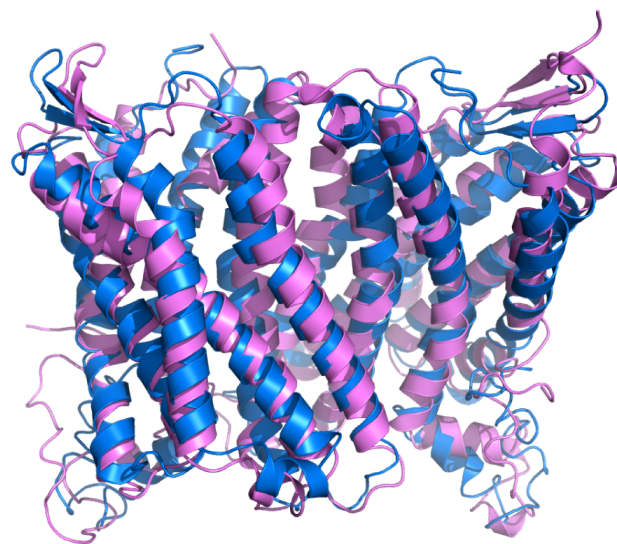

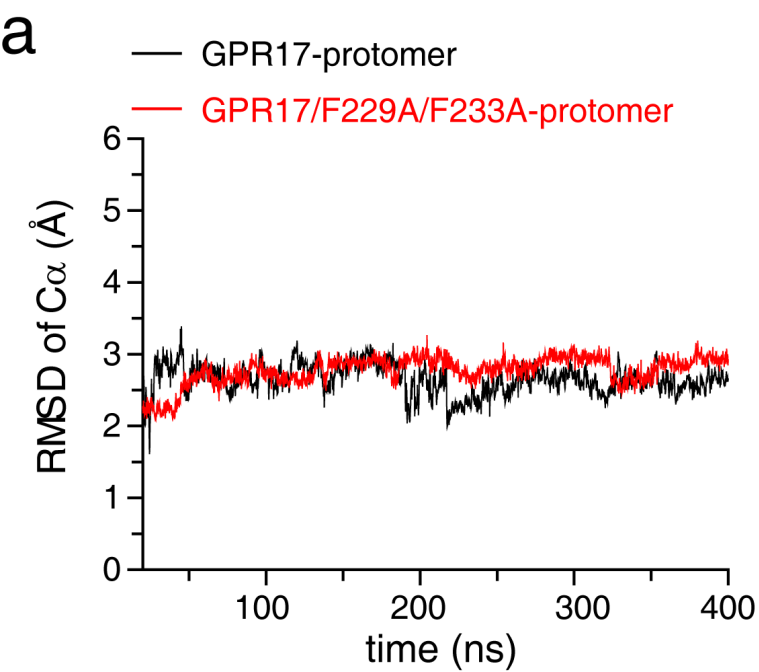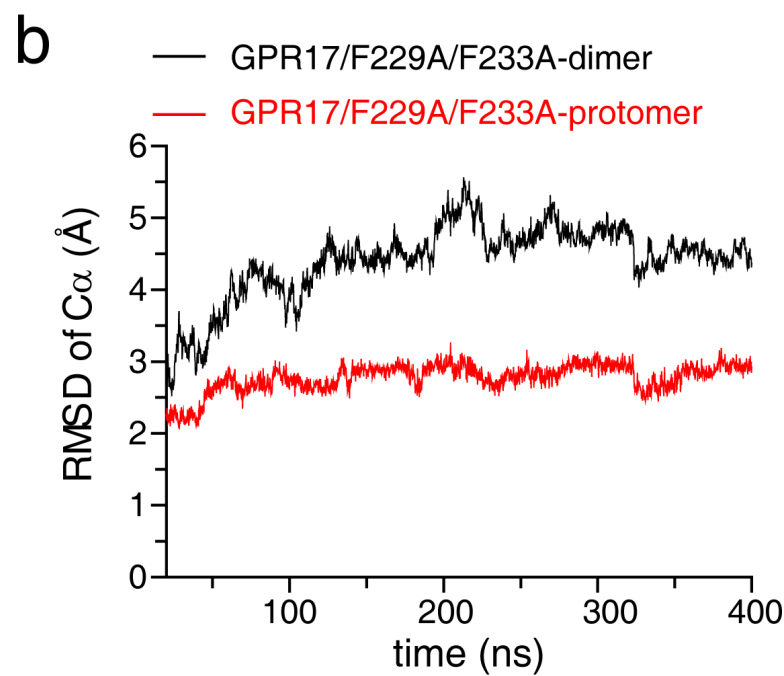

**a**

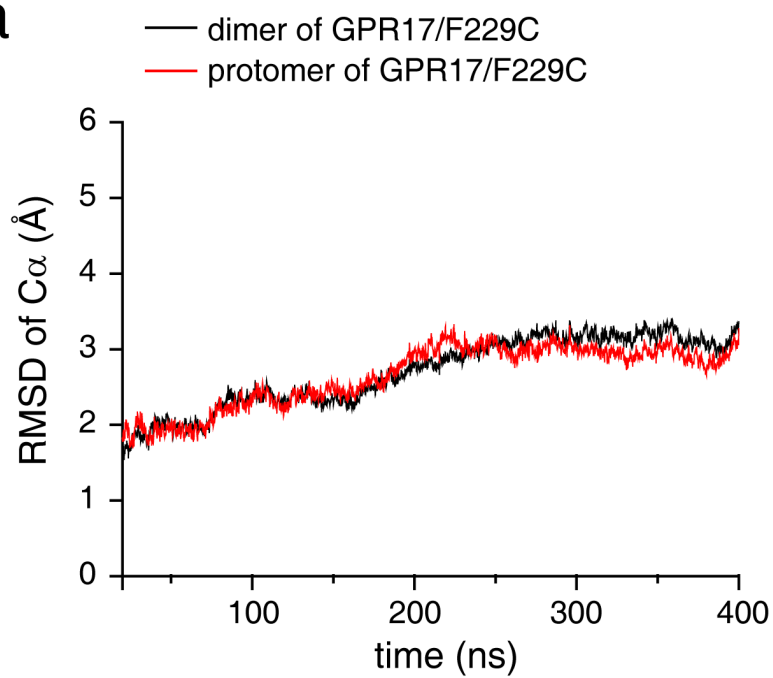

**b**

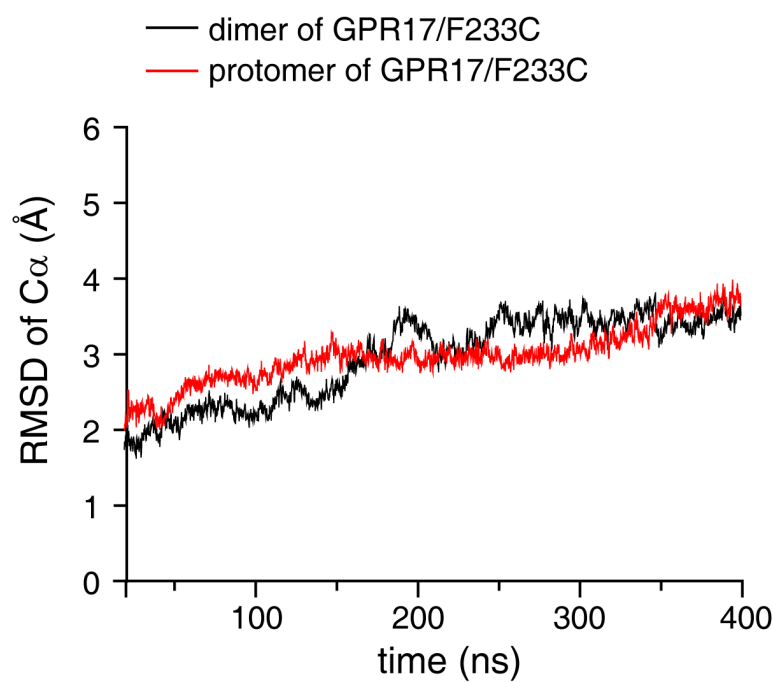



**a**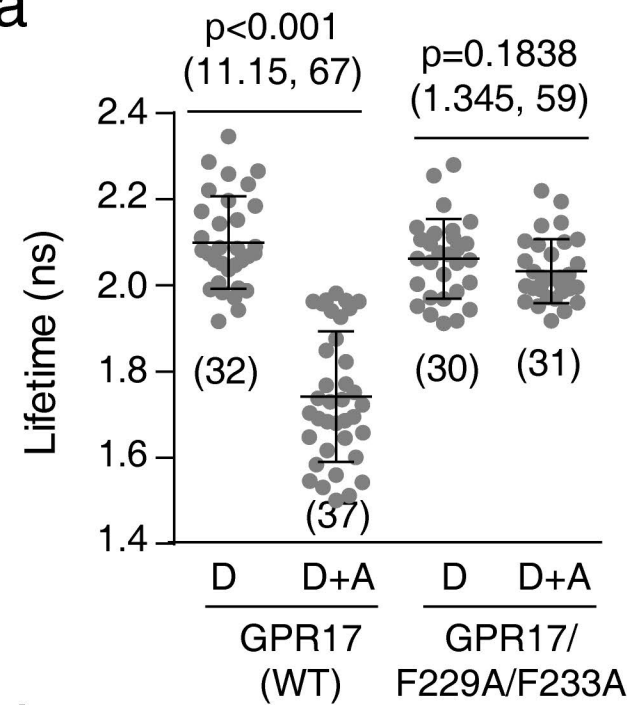**b**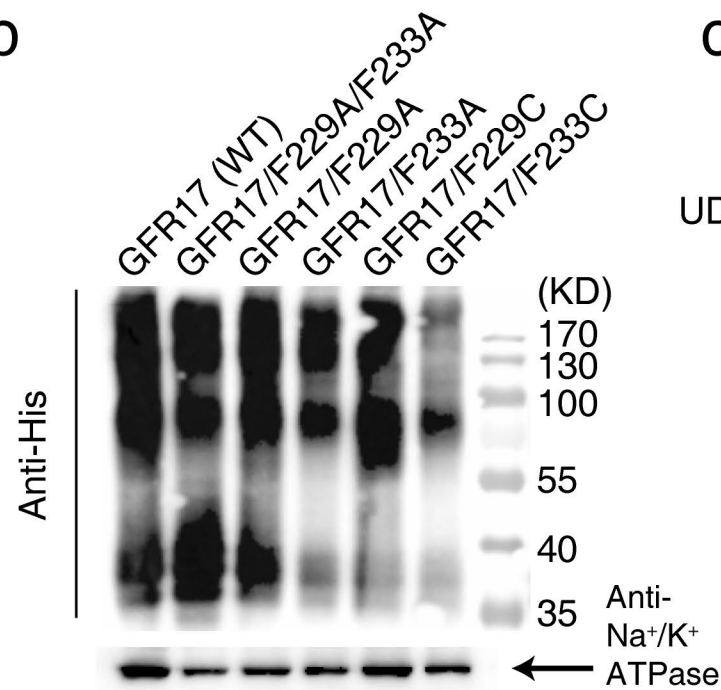**c**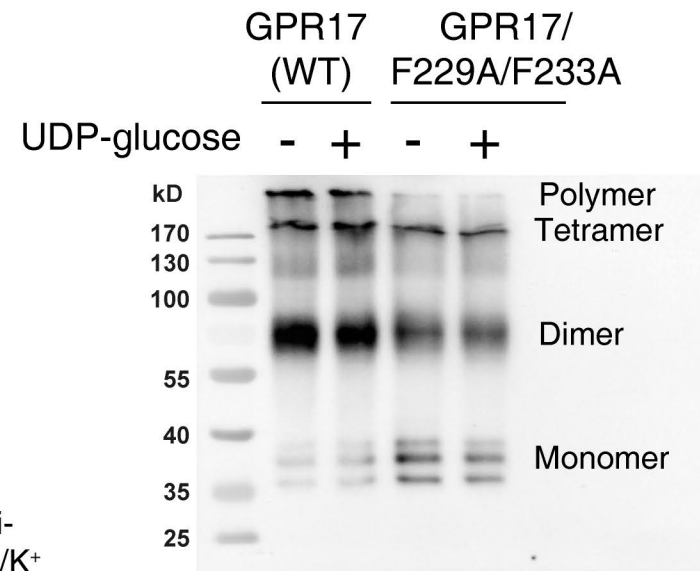

□ Control  
 ■ UDP-glucose

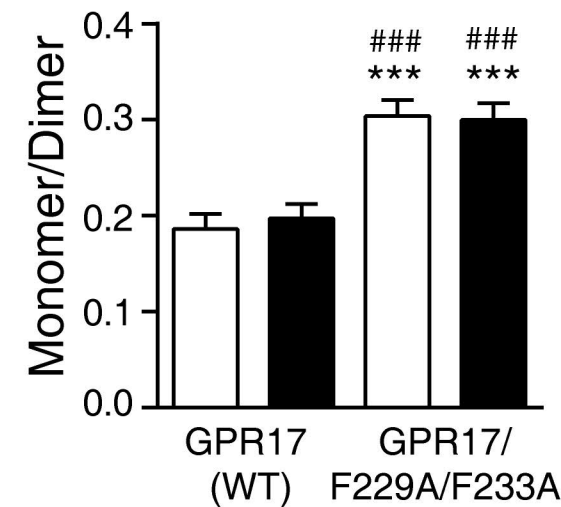**d**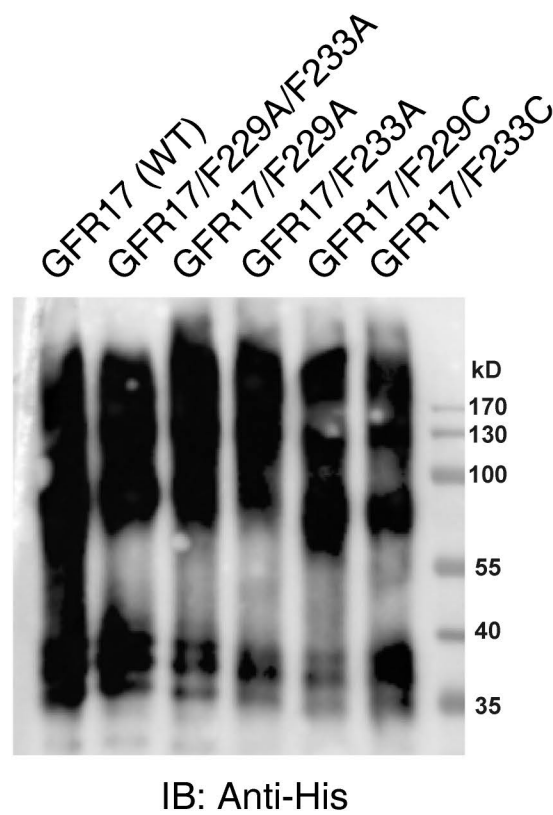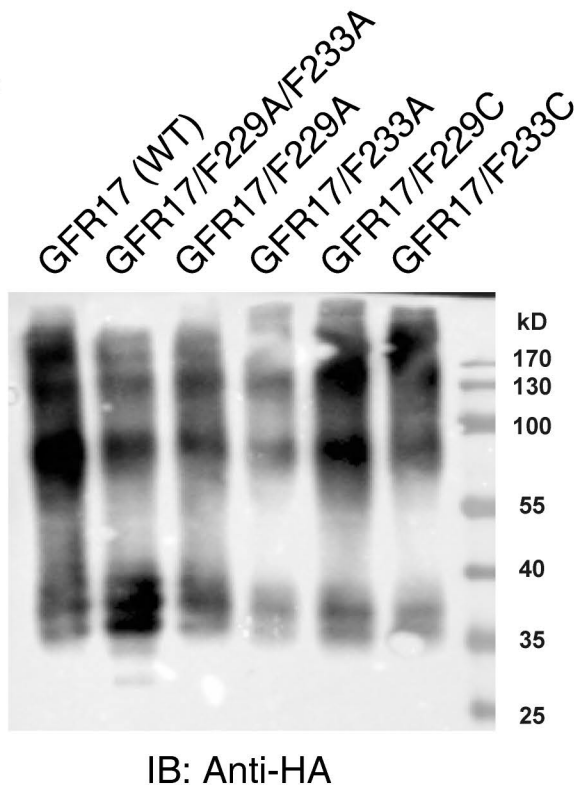

Cell lysate

**e**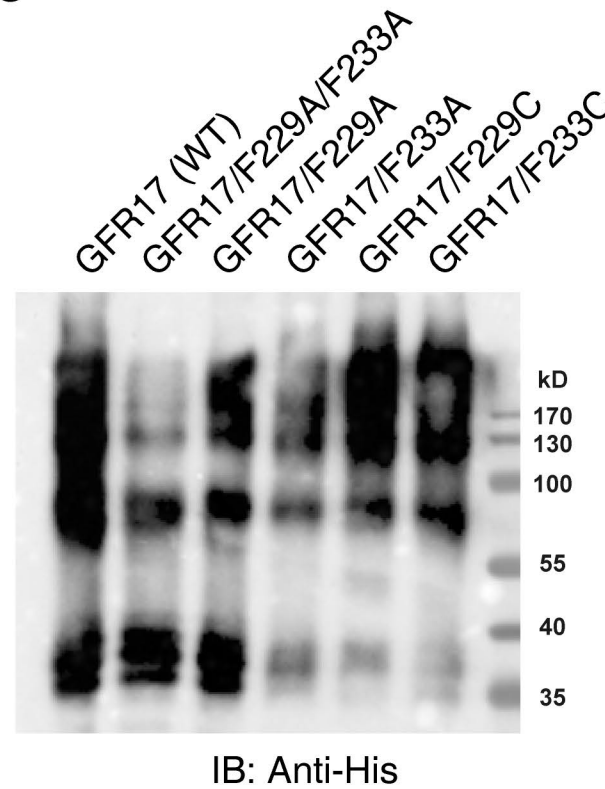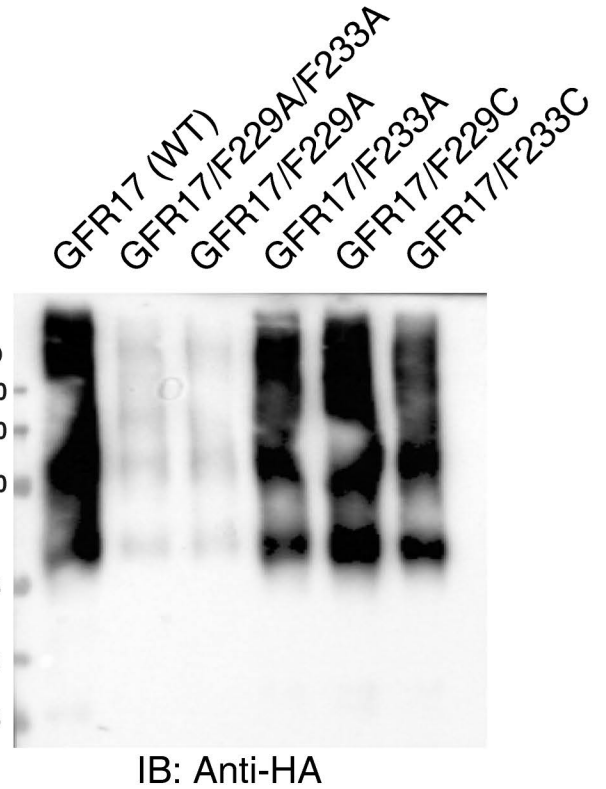

Ni-NTA agarose pull down

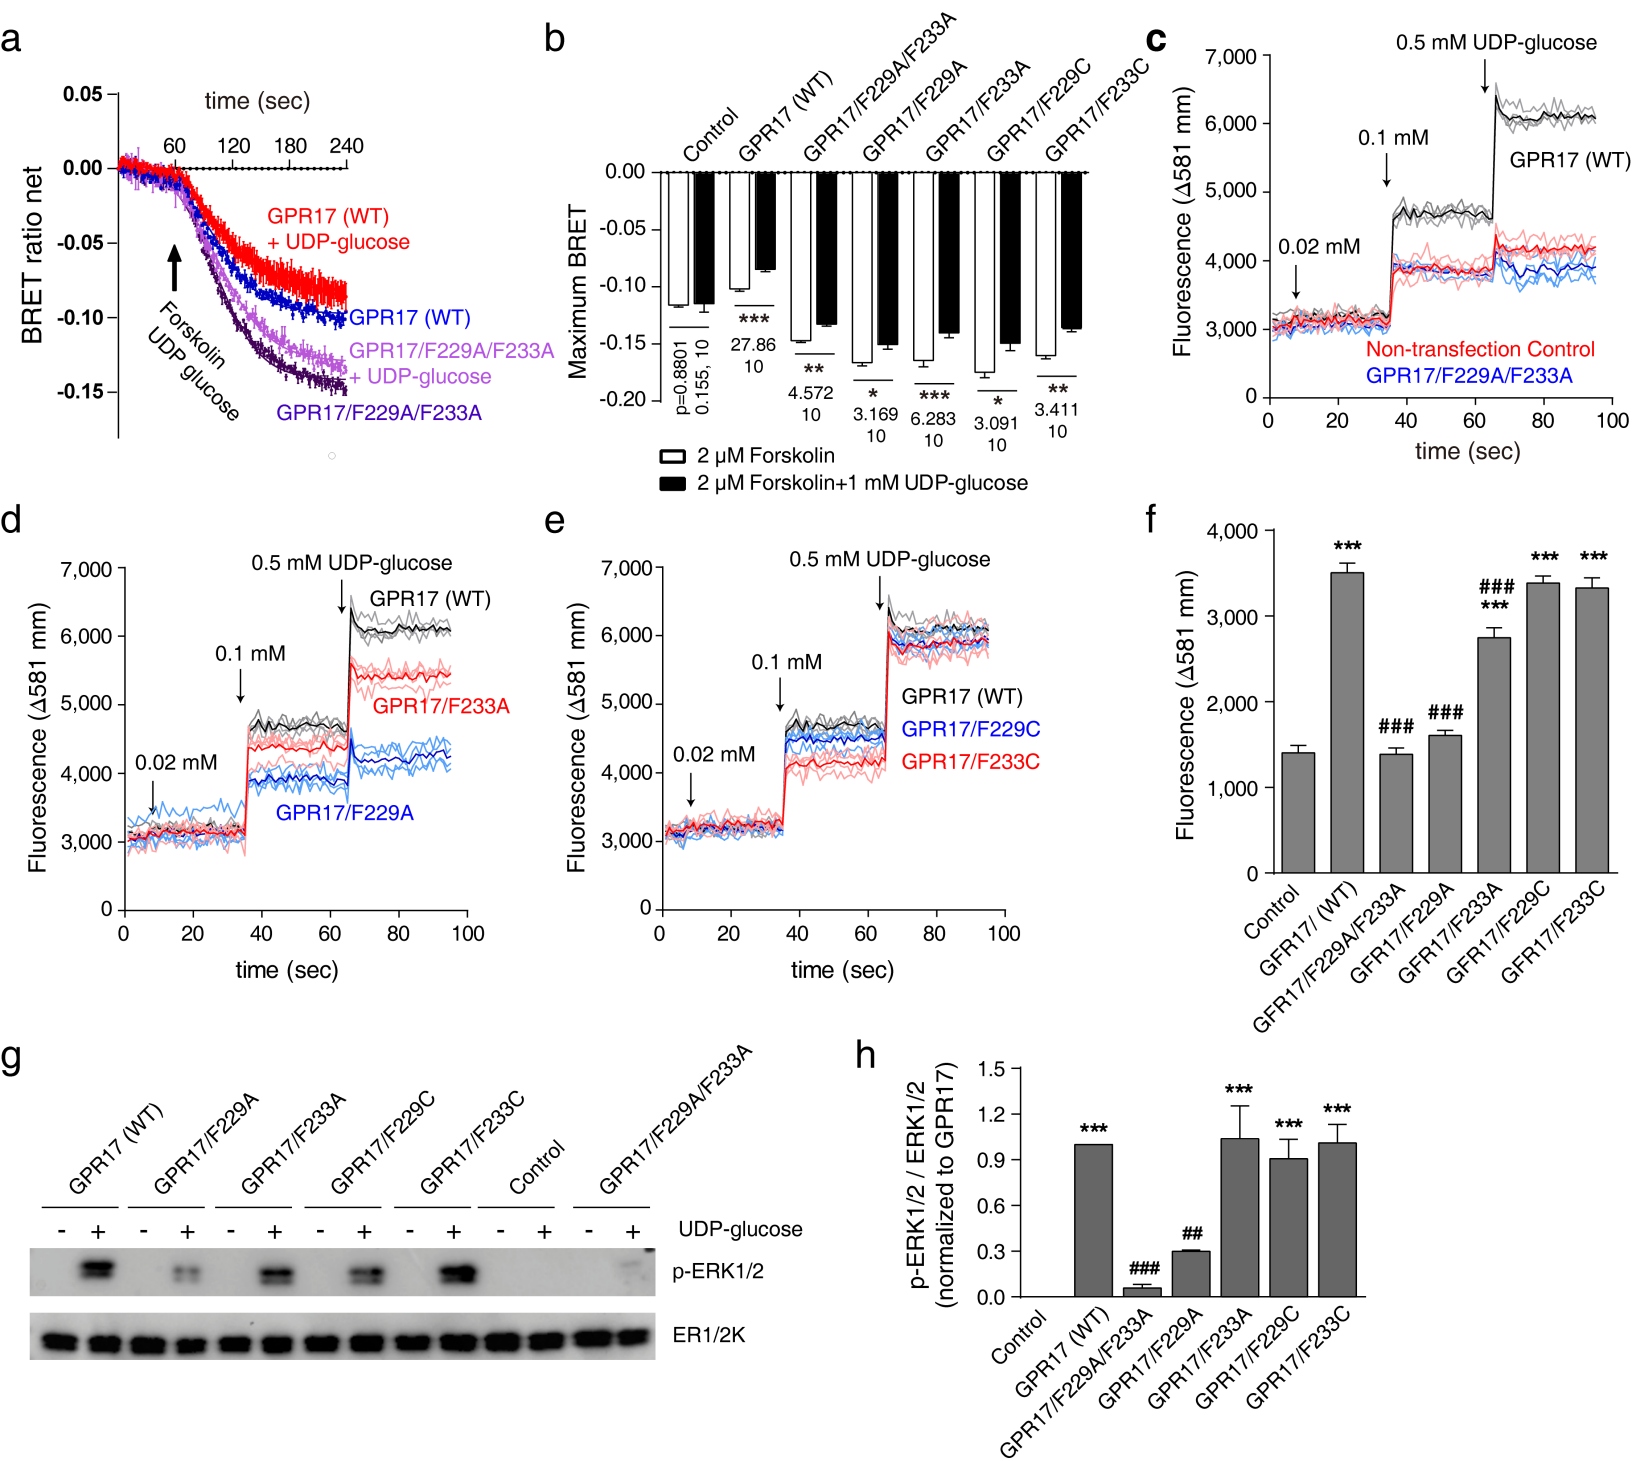

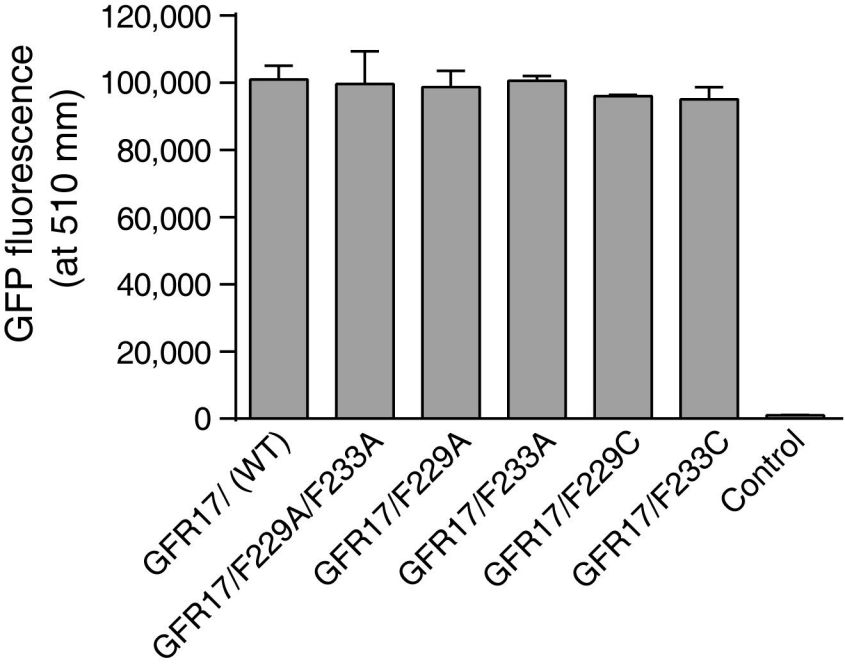

**a**

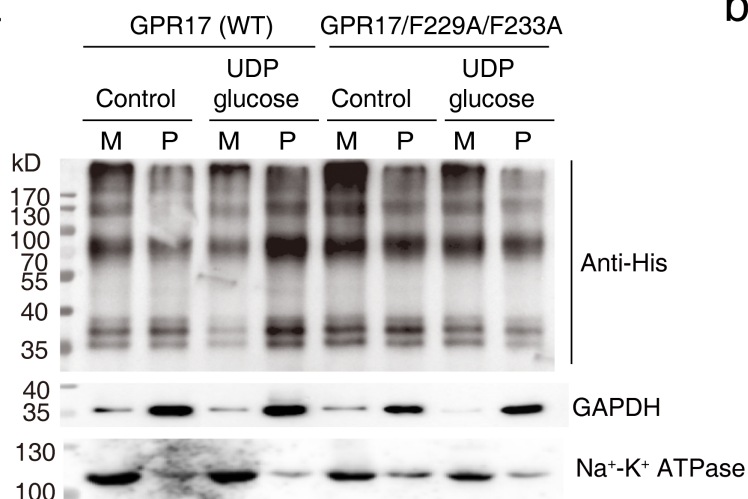

**b**

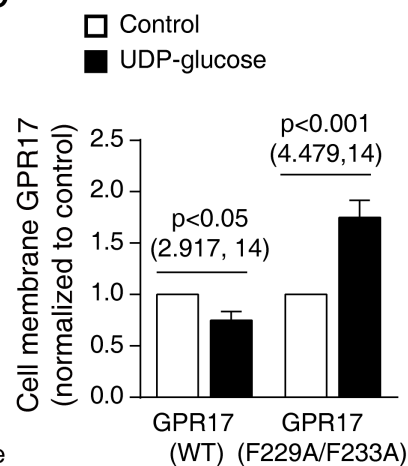

**c**

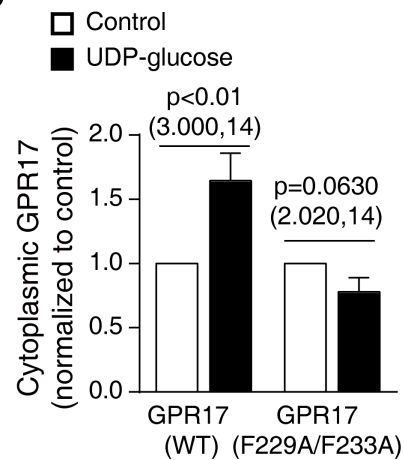

**d**

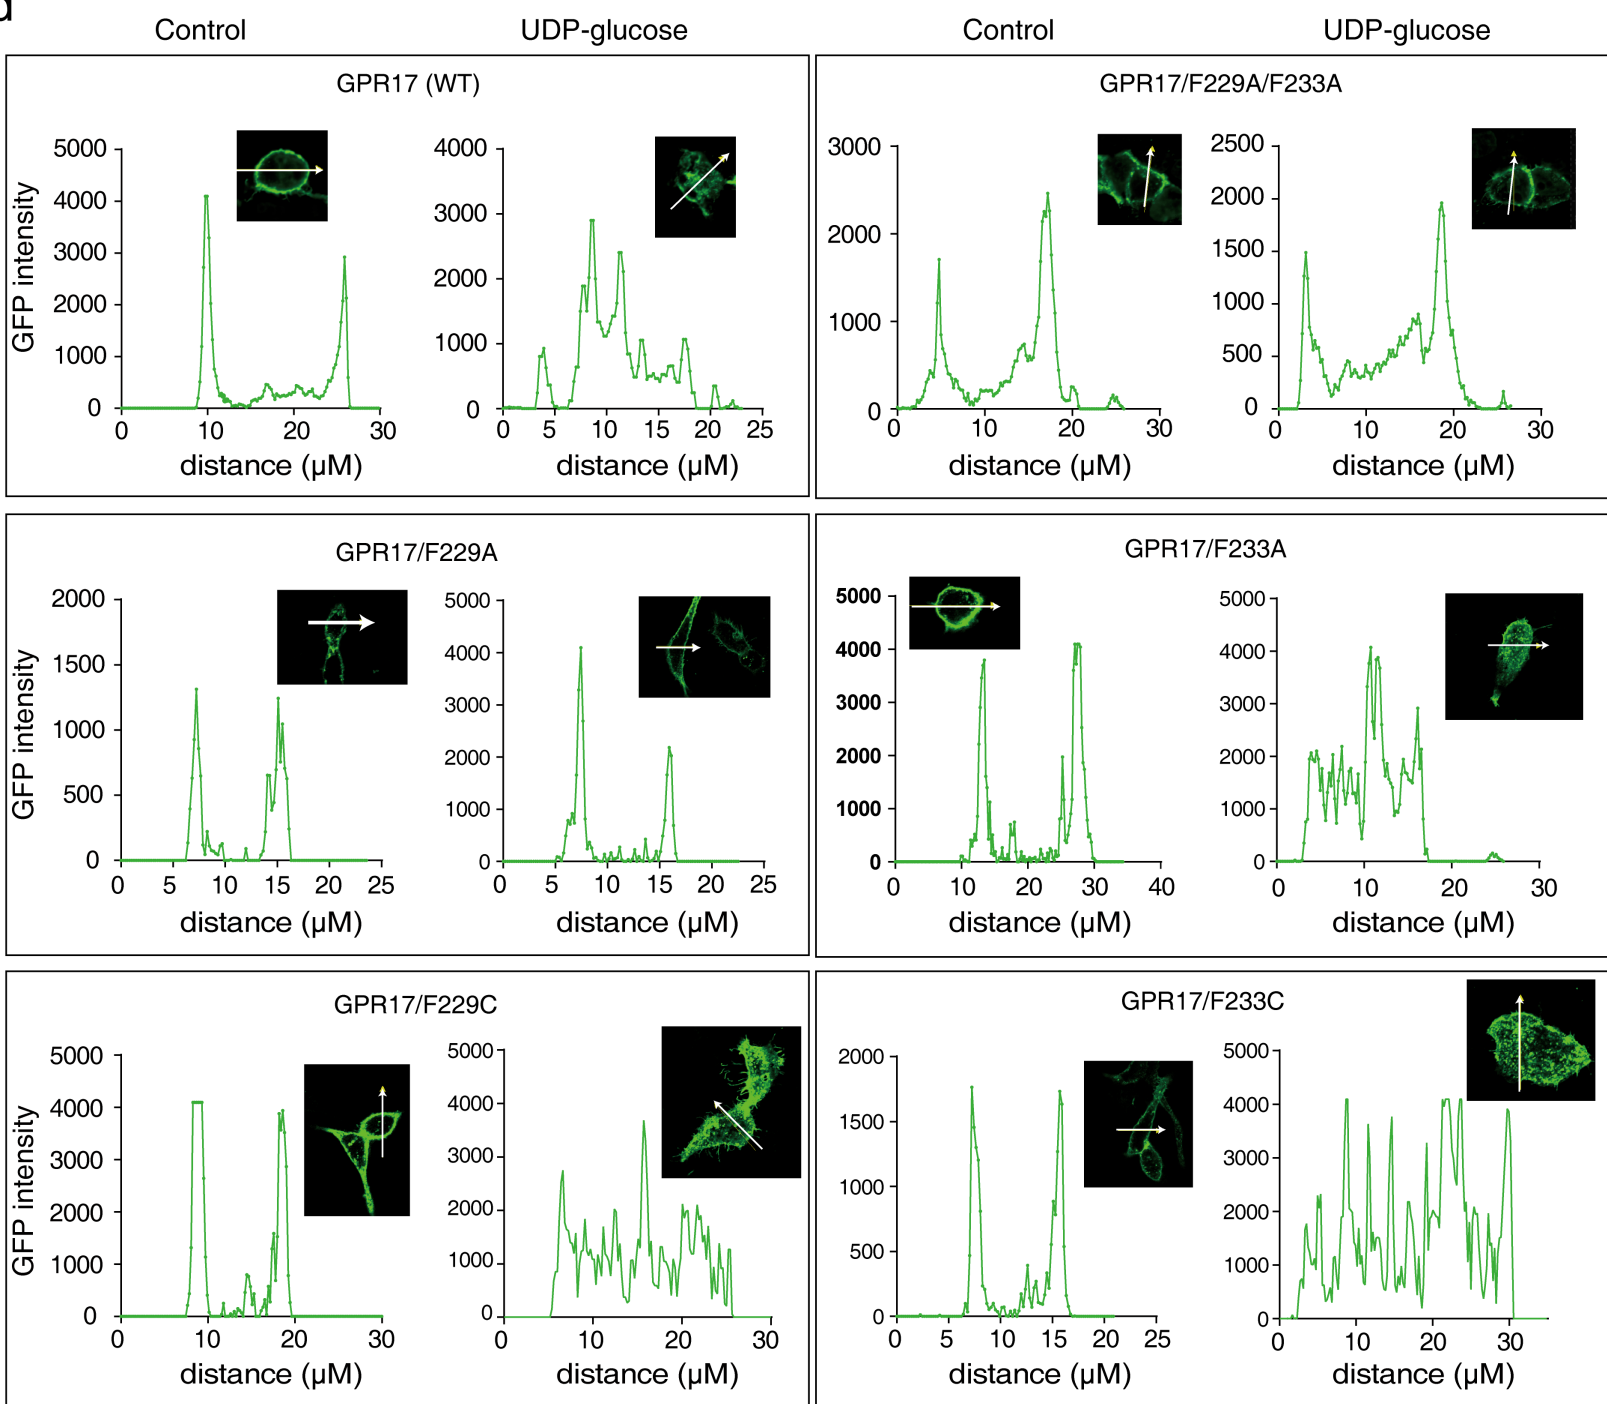

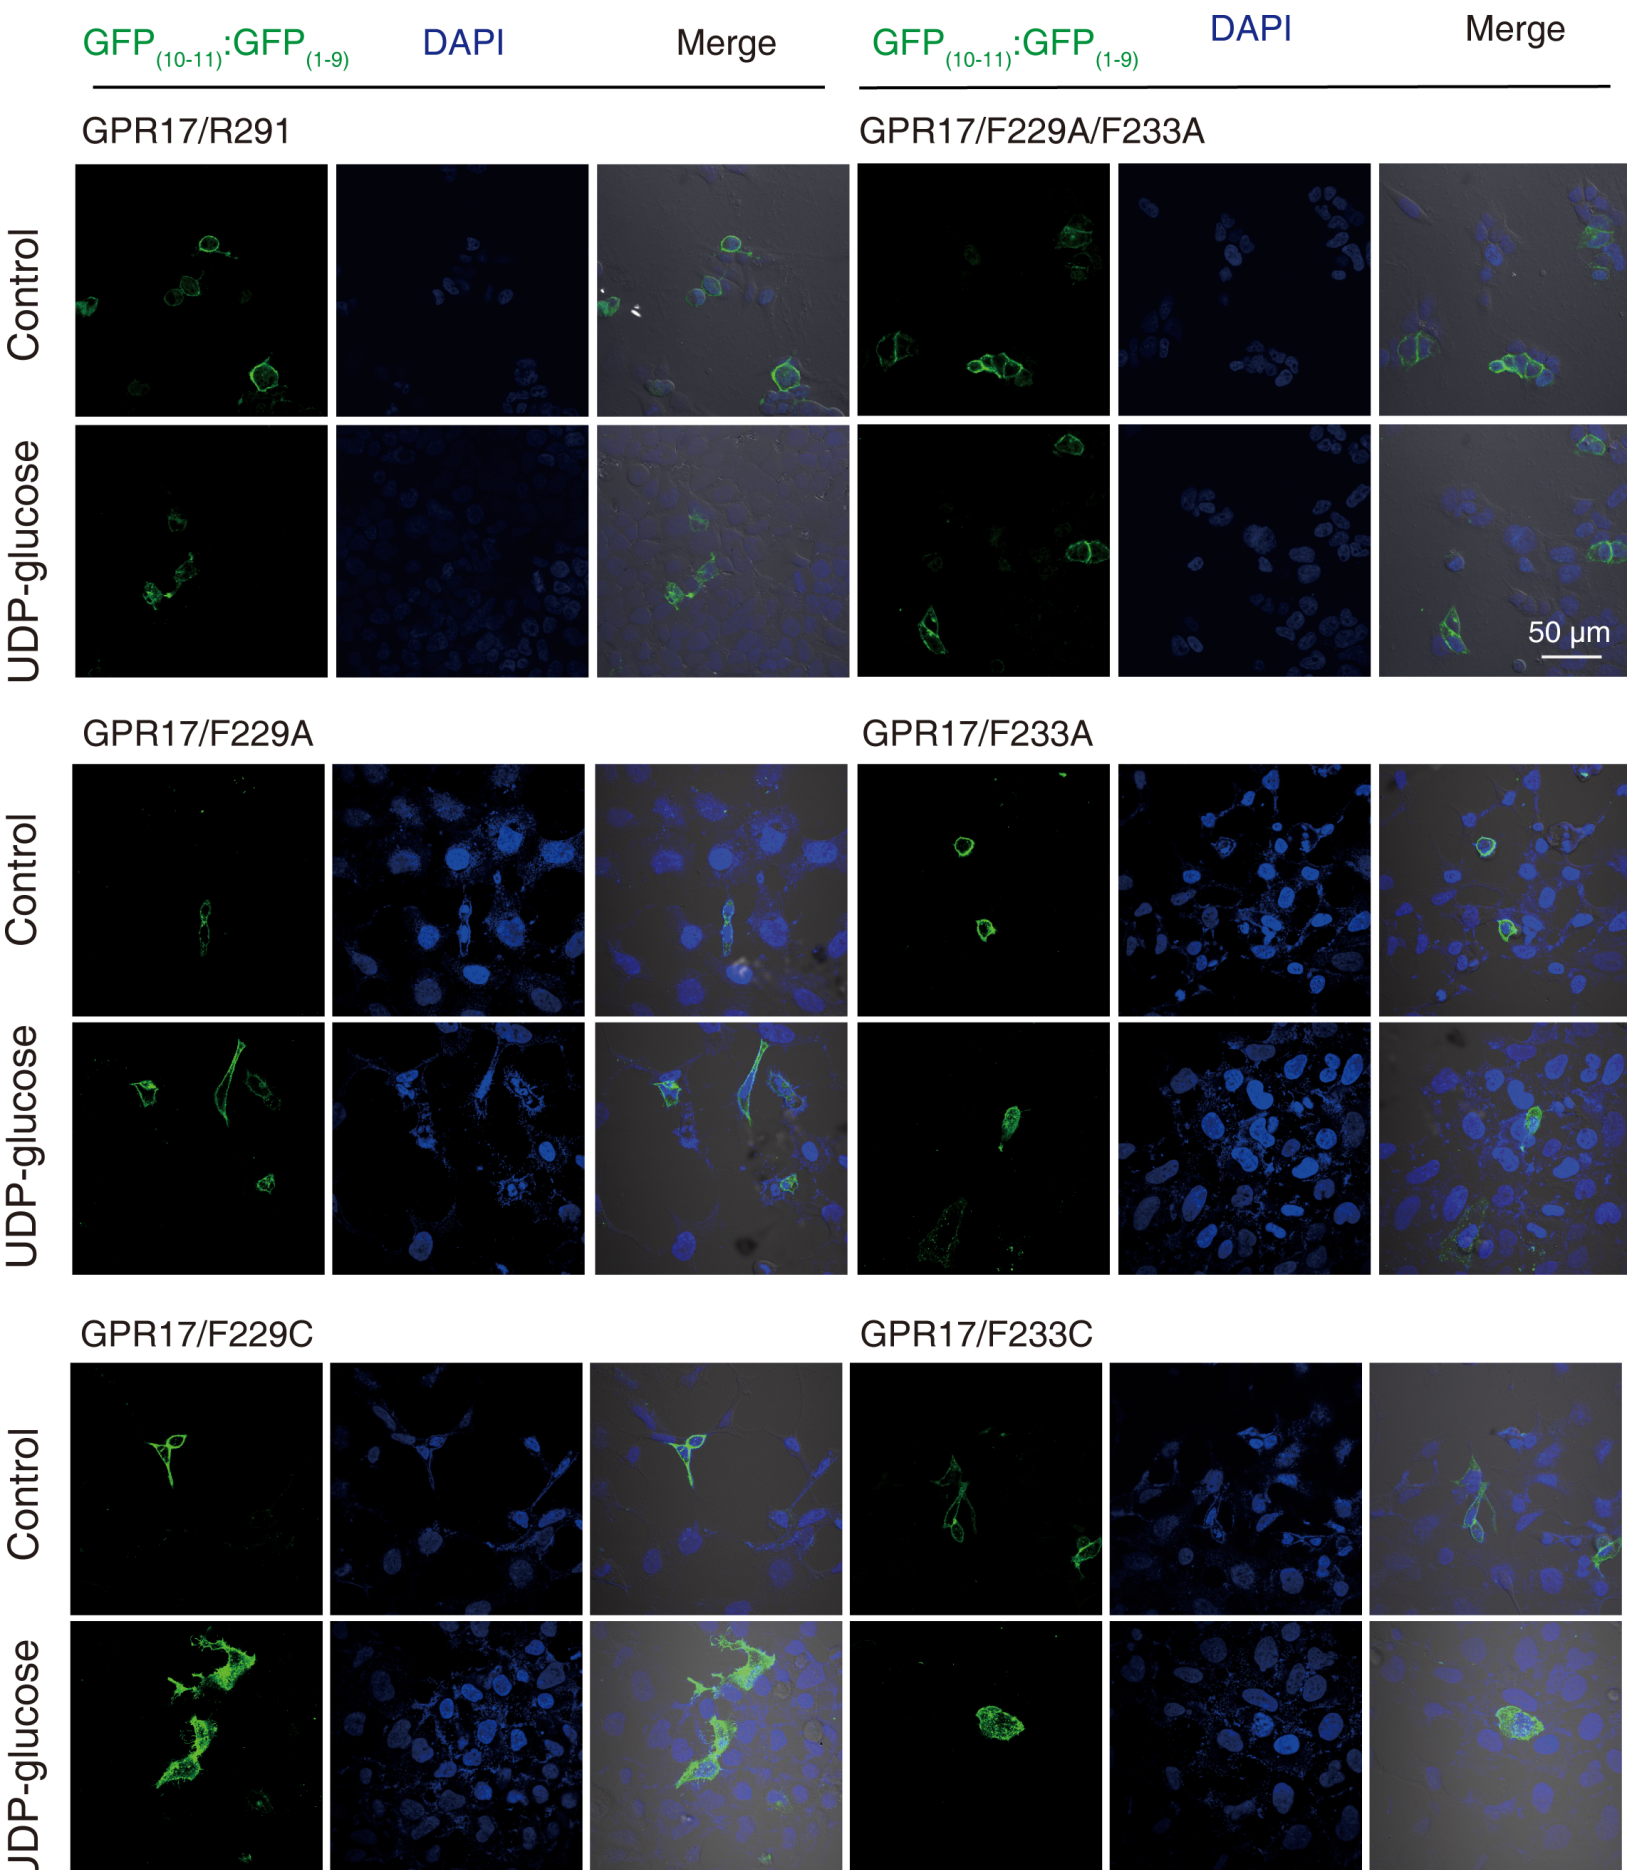

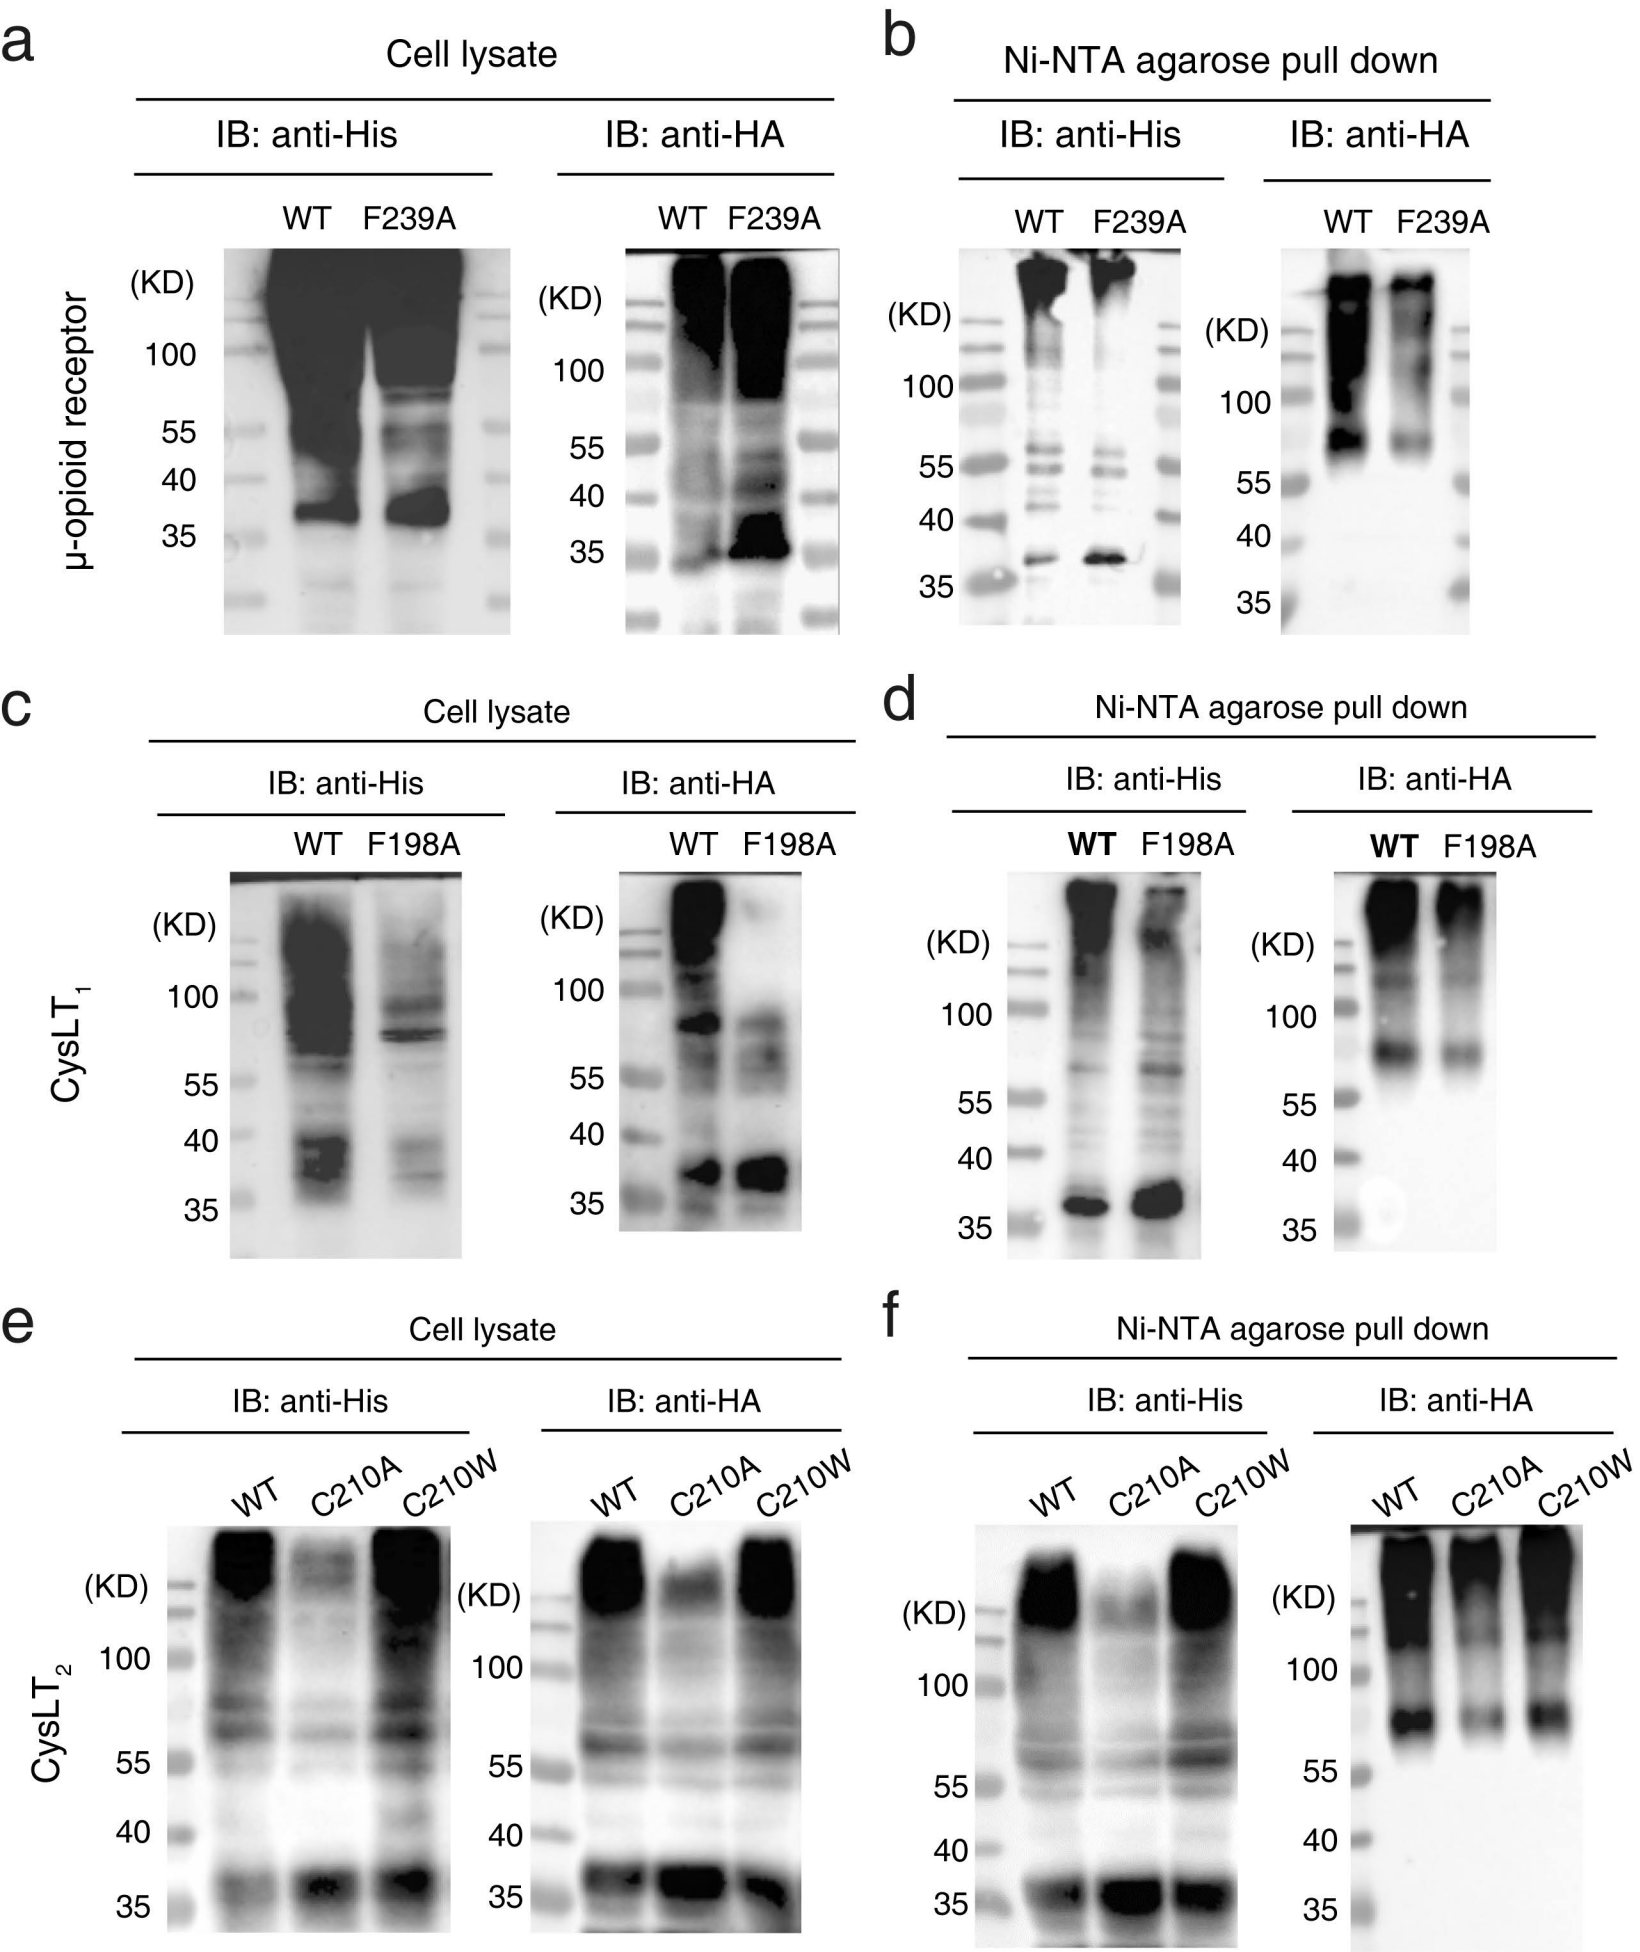

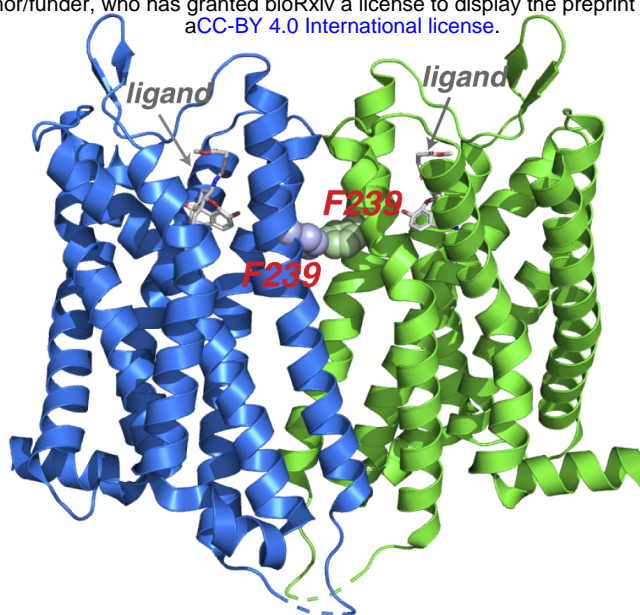

**b**

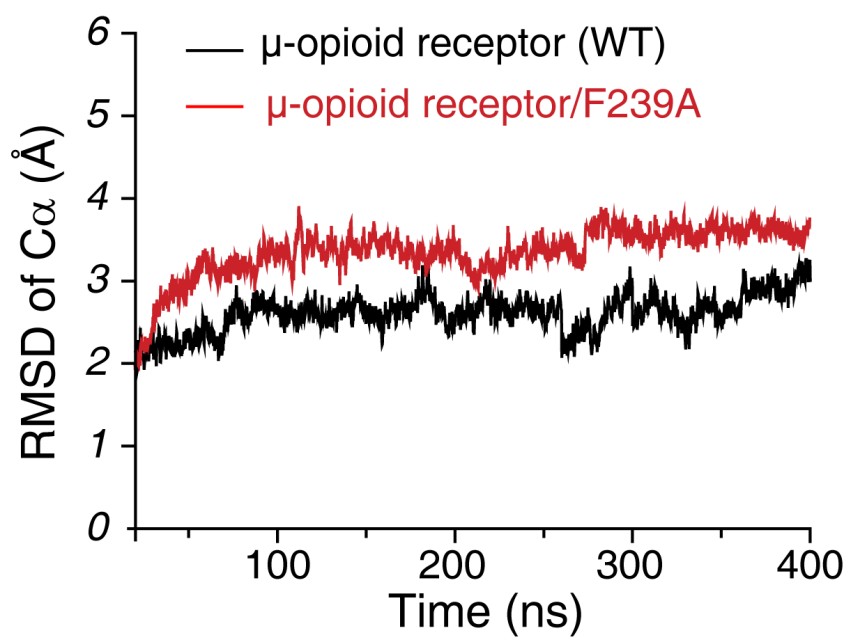

**c**

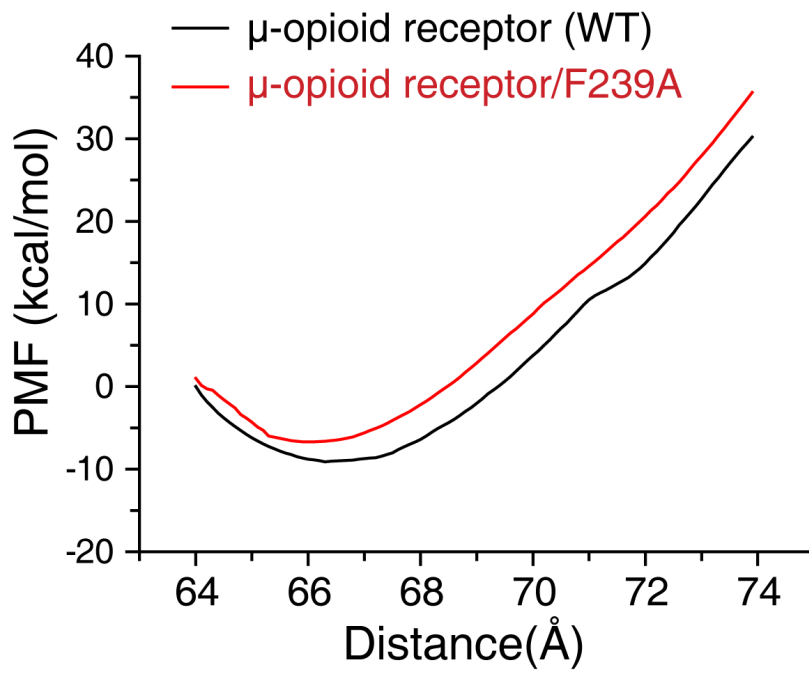

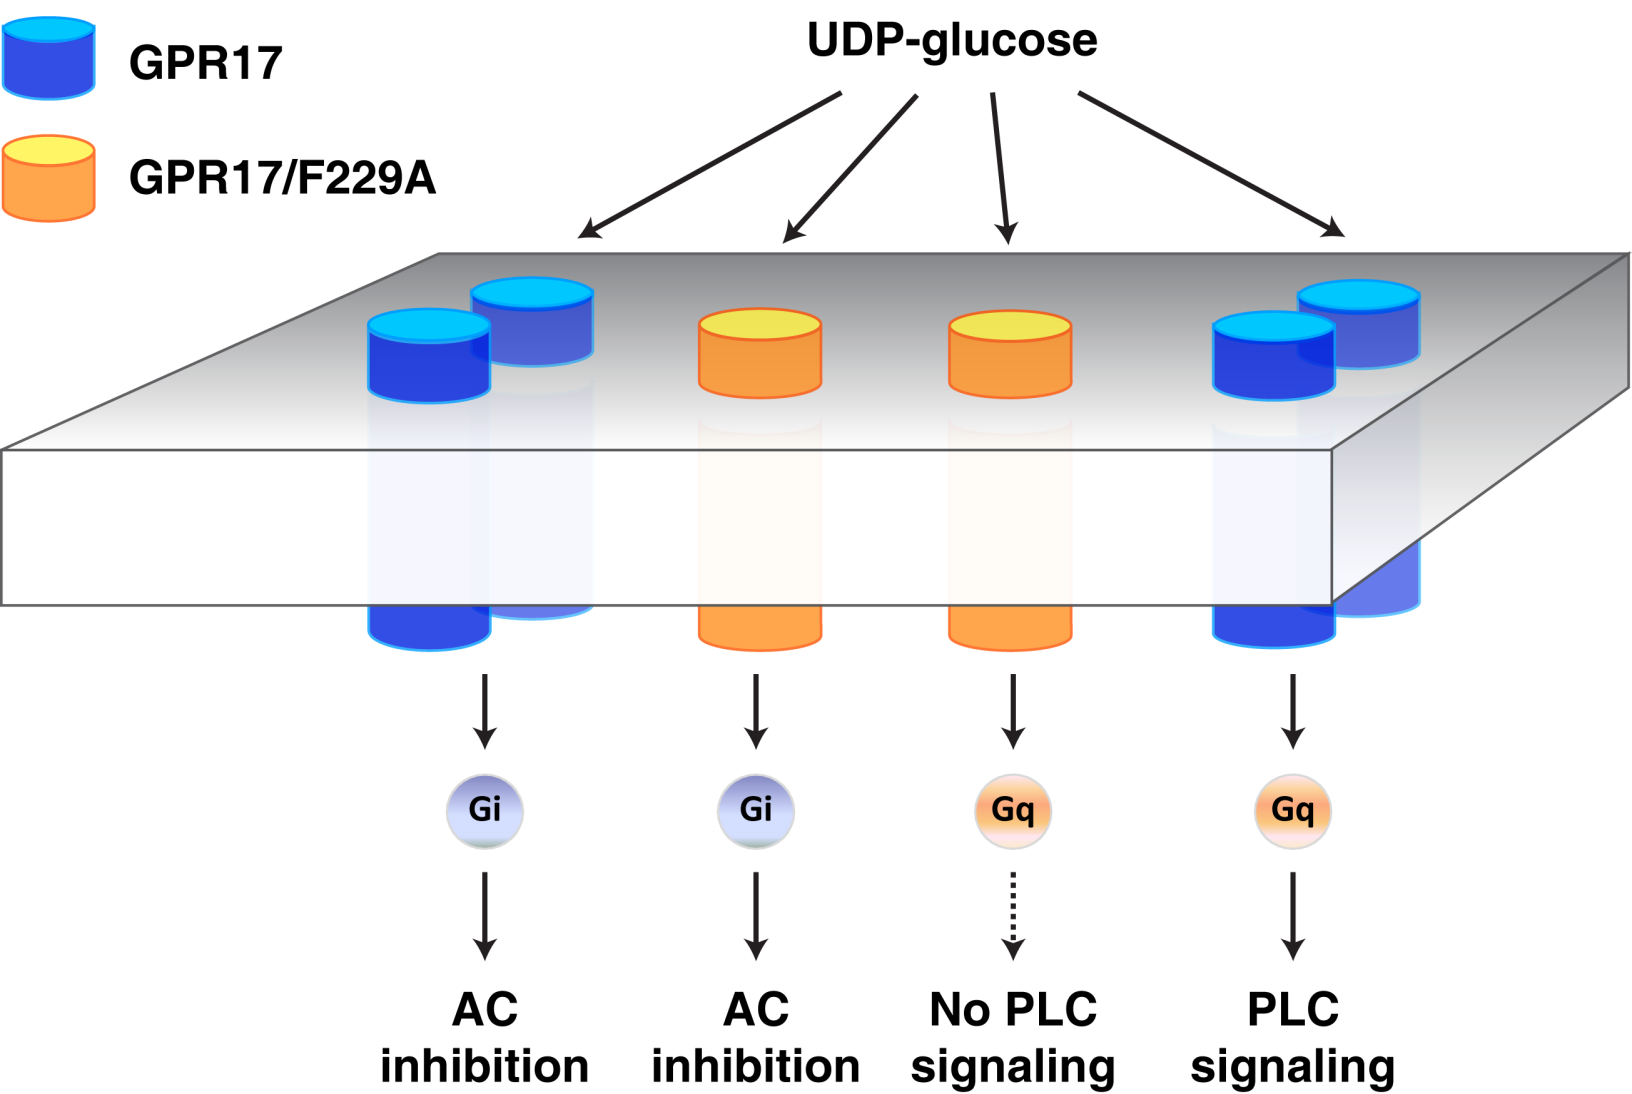

Source: https://www.biorxiv.org/content/10.1101/664094v1.full.pdf
